# Supplementary material
Source: Research Square preprint supplement (doi:10.21203/rs.3.rs-9678698/v1)
Supplement: Supplementary file 1 [file 1320eb723f989a81983c04ad.xlsx]

## Sheet: Supplementary Table S1
Supplementary Table S1. Descriptive statistics for the 229 phenotypic traits in 115 Hu ram lambs
Values were calculated from non-missing observations for each trait. Kurtosis is reported as excess kurtosis. Shapiro-Wilk P values were calculated on the available observations for each trait.
Trait	N	Mean	SD	Median	IQR	Min	Max	Range	CV (%)	Skewness	Kurtosis	Shapiro-Wilk P
Birth_weight	115	4.36565	0.807769	4.38	0.95	2.5	6.42	3.92	18.5028	0.202474	-0.346097	0.414496
Weaning_weight	115	15.6901	2.55699	15.4	3.65	12.1	22.6	10.5	16.2968	0.576776	-0.279903	0.000540356
BW_80	115	18.8648	2.89105	18.5	4.18	13.8	27.5	13.7	15.3251	0.606743	-0.0941413	0.00565582
BW_100	115	24.2757	3.64861	24	5.3	15.1	32.3	17.2	15.0299	0.178242	-0.52556	0.223048
BW_120	115	30.45	4.16679	30.4	5	18.9	39.8	20.9	13.684	-0.0969698	0.296098	0.432264
BW_140	115	36.7039	4.40856	36.8	6.2	23.85	46.4	22.55	12.0111	-0.289892	0.192605	0.508469
BW_160	115	42.5756	4.78525	42.6	5.85	23.85	54.9	31.05	11.2394	-0.340757	1.59012	0.0842442
BW_180	115	48.0657	4.52828	48.3	6.15	36.2	58.5	22.3	9.42102	-0.05572	-0.265811	0.978563
Hight_80	115	53.9043	2.40968	54	3	48	61	13	4.47029	0.0831349	0.218613	0.266324
Hight_100	115	57.0478	2.12749	57	3	52	64	12	3.7293	0.348421	0.259228	0.0278877
Hight_120	115	60.4983	2.26682	60.5	3	53	67.67	14.67	3.74692	0.025134	0.869847	0.150382
Hight_140	115	62.9925	2.10423	63	2.25	57	70.75	13.75	3.34044	0.179835	1.22783	0.0677245
Hight_160	115	64.6108	1.78776	65	2.625	60	70.75	10.75	2.76696	0.253358	0.690469	0.0314426
Hight_180	115	67.0354	2.60603	67	3	61.6	74	12.4	3.88755	0.567947	0.421732	0.00407883
Length_80	115	56.013	2.78582	56	4	50	63	13	4.97352	0.203567	-0.410819	0.0683574
Length_100	115	59.9094	2.38746	60	3	54	67	13	3.98512	0.120812	0.0961902	0.3739
Length_120	115	63.6029	2.52753	64	3	54	69	15	3.97392	-0.594882	1.37022	0.00790225
Length_140	115	67.3203	2.55233	67	3	61	74	13	3.79132	0.0139017	-0.0531307	0.389887
Length_160	115	70.1217	2.55517	70	3.625	62.5	76	13.5	3.64391	-0.16161	-0.0478446	0.344481
Length_180	115	73.4978	3.36153	73	4	67	85	18	4.57365	0.626211	0.848309	0.00910117
Chest_80	115	60.0413	3.13633	60	4	53	68	15	5.22362	0.120963	-0.221763	0.442994
Chest_100	115	65.7717	3.64796	66	5	58	76	18	5.5464	0.243536	-0.320794	0.183467
Chest_120	115	69.5109	3.87559	69	5	61	78.5	17.5	5.57551	0.153178	-0.424028	0.242932
Chest_140	115	73.9283	3.30897	74	4	65	82	17	4.47592	-0.209204	0.0402383	0.240674
Chest_160	115	77.387	3.46287	77	4.75	69	86	17	4.47475	0.0372497	-0.0660783	0.239138
Chest_180	115	84.0043	4.51969	83	6	73	98	25	5.38031	0.524285	0.374538	0.0325252
Cannon_circumference_80	115	6.47435	0.412147	6.5	0.7	5.6	7.3	1.7	6.36585	0.151714	-0.800907	0.021711
Cannon_circumference_100	115	6.79652	0.387767	6.8	0.54	5.85	7.8	1.95	5.70537	0.236835	-0.390068	0.171332
Cannon_circumference_120	115	7.24939	0.389113	7.3	0.5	6.3	8.1	1.8	5.36753	-0.021946	-0.290457	0.134838
Cannon_circumference_140	115	7.53939	0.390268	7.5	0.5	6.62	8.5	1.88	5.17639	0.00452113	-0.0673845	0.460247
Cannon_circumference_160	115	7.79922	0.384528	7.8	0.5	6.8	8.8	2	4.93034	0.125797	0.0723827	0.256147
Cannon_circumference_180	115	8.20852	0.445091	8.1	0.6	7.3	9.5	2.2	5.4223	0.90021	1.02158	3.85929e-05
Scrotal_circumference_100	114	17.1645	2.02906	17	2.5	12.5	22.5	10	11.8213	0.0310862	-0.278815	0.518057
Scrotal_circumference_120	114	20.5201	2.11672	21	3	13.25	25	11.75	10.3154	-0.499164	0.563349	0.0115547
Scrotal_circumference_140	115	23.0408	2.05453	23.5	2.415	15.75	27.83	12.08	8.91691	-0.786405	1.23881	0.00137084
Scrotal_circumference_160	115	24.293	2.04772	24.5	2.25	18.33	29	10.67	8.42927	-0.419031	0.47733	0.076184
Scrotal_circumference_180	115	25.4942	2.37563	26	3	18.75	31	12.25	9.31832	-0.461069	-0.0833235	0.0378229
X100d_Intratail_length	76	16.2503	2.39099	16	2.625	11	25.5	14.5	14.7135	0.739486	2.17831	0.0269442
X100d_Outside_the_long_tail	76	21.1726	3.16315	21	3.3775	12	34.25	22.25	14.9398	0.924691	4.29648	0.000240476
X100d_Intratail_width	76	12.0139	1.88293	11.5	2.69	8.25	17.5	9.25	15.6729	0.41287	-0.0705391	0.177328
X100d_the_tail_circumference	76	22.5604	3.4455	23	3	12	31	19	15.2723	-0.326714	1.33066	0.0366702
X120d_Intratail_length	114	17.7726	2.27987	17.69	2.9375	12	25.5	13.5	12.828	0.185781	0.550052	0.428951
X120d_Outside_the_long_tail	114	21.5719	2.73834	21.5	3	15.75	34.25	18.5	12.694	1.12731	4.12364	1.60217e-05
X120d_Intratail_width	114	13.1104	2.1269	13	2	8.25	19.5	11.25	16.223	0.333498	0.330828	0.124543
X120d_the_tail_circumference	114	23.5271	3.28361	23.75	3.75	12	32	20	13.9567	-0.685938	2.32472	0.000362278
X140d_Intratail_length	115	19.6289	2.42862	19.5	3	14.5	30.67	16.17	12.3727	0.745538	2.57947	0.00110899
X140d_Outside_the_long_tail	115	23.1265	2.53124	23	3	17	34.25	17.25	10.9452	0.833778	2.92031	0.00065753
X140d_Intratail_width	115	14.0681	2.4067	14	3.75	8.67	20.25	11.58	17.1075	0.0689043	-0.342442	0.660825
X140d_the_tail_circumference	115	25.4587	3.70551	25.5	4.5	12.5	34	21.5	14.555	-0.604202	1.03885	0.0438234
X160d_Intratail_length	115	20.5535	2.33056	21	3	14.5	30.67	16.17	11.339	0.40899	2.15297	0.00363024
X160d_Outside_the_long_tail	115	23.9396	2.72349	24	3.415	18.5	34.25	15.75	11.3765	0.774292	1.65298	0.00115692
X160d_Intratail_width	115	15.5392	2.29363	16	3	8.67	21	12.33	14.7603	-0.285916	0.0453588	0.302924
X160d_the_tail_circumference	114	27.6111	4.14157	27.5	4.9575	12.5	39	26.5	14.9997	-0.0792122	1.56415	0.0415241
X180d_Intratail_length	115	22.0477	3.05262	22	3.5	16	39	23	13.8455	1.6201	7.75324	1.77234e-07
X180d_Outside_the_long_tail	115	25.9035	3.29279	26	4	18.67	37	18.33	12.7118	0.426563	0.415475	0.160485
X180d_Intratail_width	115	18.1913	2.8343	18	4	12	26	14	15.5805	0.346877	-0.0125656	0.08821
X180d_the_tail_circumference	115	34.234	6.34711	33.5	8.5	18	48	30	18.5404	0.183447	-0.182338	0.0936662
ADG_80.100	115	0.270543	0.0752458	0.285	0.0905	0.06	0.415	0.355	27.8128	-0.880941	0.4285	4.74116e-05
ADG_100.120	115	0.309609	0.0673566	0.31	0.085	0.06	0.455	0.395	21.7554	-0.749682	1.63113	0.00359282
ADG_120.140	113	0.318982	0.0733575	0.33	0.085	0.06	0.46	0.4	22.9974	-0.921611	1.49021	0.000584292
ADG_140.160	111	0.291441	0.0951515	0.29	0.14	0.11	0.525	0.415	32.6486	0.236186	-0.622748	0.122939
ADG_160.180	112	0.274362	0.0972144	0.265	0.13125	0.015	0.55	0.535	35.4329	0.406283	0.665876	0.132036
ADG_80.180	115	0.291749	0.0349796	0.294	0.04275	0.201	0.371	0.17	11.9896	-0.171596	-0.146718	0.694089
MBW_80.100	115	8.39951	0.933255	8.35934	1.35703	6.2484	10.7522	4.50377	11.1108	0.352432	-0.46538	0.0503828
MBW_100.120	115	10.044	1.0665	10.0292	1.50284	7.05563	12.3715	5.31584	10.6182	-0.0506365	-0.119727	0.743662
MBW_120.140	113	11.7673	1.03595	11.6829	1.32005	8.75948	14.0833	5.32385	8.80367	-0.0373072	-0.0968133	0.908167
MBW_140.160	113	13.3322	1.02749	13.2366	1.30352	10.9806	15.9298	4.94922	7.70686	0.0900956	-0.154749	0.708668
MBW_160.180	113	14.7287	1.02928	14.6344	1.37057	12.3715	17.1449	4.77338	6.98823	0.0966668	-0.259402	0.77853
MBW_80.180	114	11.7054	0.866015	11.591	1.25184	9.96014	14.1203	4.16016	7.39842	0.262913	-0.459573	0.280589
ADFI_80.100	115	1.34178	0.29057	1.355	0.35625	0.375	1.985	1.61	21.6555	-0.67983	0.804478	0.00919507
ADFI_100.120	114	1.56376	0.259813	1.57925	0.255875	0.481	2.185	1.704	16.6146	-0.847326	2.63092	0.000882231
ADFI_120.140	111	1.55174	0.391801	1.589	0.4875	0.523	2.3965	1.8735	25.2492	-0.339489	0.104151	0.374383
ADFI_140.160	114	1.99947	0.280245	1.99725	0.36625	1.425	2.83	1.405	14.016	0.14347	-0.112842	0.658818
ADFI_160.180	115	2.13117	0.283717	2.14	0.3275	1.25	2.925	1.675	13.3127	0.16478	1.27025	0.0240815
ADFI_80.180	115	1.7394	0.23043	1.722	0.29315	1.1759	2.2538	1.0779	13.2477	0.154983	-0.385328	0.389249
FCR_80.100	114	5.16167	1.21552	4.83199	1.08042	3.3012	10.6667	7.36546	23.5489	1.93118	4.61882	2.04115e-10
FCR_100.120	114	5.13778	0.928161	5.03397	1.37794	3.35909	8.46857	5.10948	18.0654	0.626637	0.58224	0.0255179
FCR_120.140	112	5.27444	1.9186	4.88803	1.98676	1.70635	10.5455	8.83911	36.3755	1.13371	0.985987	5.71678e-07
FCR_140.160	112	7.47762	2.47922	7.00202	3.22506	1.88398	14.4091	12.5251	33.1552	0.615554	0.074552	0.00462754
FCR_160.180	108	8.14798	2.48018	7.88387	3.01154	2.36757	14.875	12.5074	30.4392	0.509925	0.106614	0.0142118
FCR_80.180	115	5.97612	0.679121	5.91603	0.913735	4.53187	7.61328	3.08141	11.3639	0.229684	-0.476924	0.247374
RFI_80.100	115	-0.0103153	0.147001	-0.00873	0.174305	-0.44674	0.355	0.80174	NA	-0.346321	0.675363	0.227063
RFI_100.120	114	-0.0194646	0.152377	-0.006035	0.167285	-0.54873	0.51229	1.06102	NA	-0.476668	2.10401	0.00237092
RFI_120.140	108	-0.0449829	0.256778	-0.02605	0.286225	-0.66975	0.76618	1.43593	NA	-0.231587	0.494667	0.00469568
RFI_140.160	114	0.00110263	0.221547	-0.00339	0.23629	-0.66823	0.73826	1.40649	NA	0.646303	2.00853	0.000479819
RFI_160.180	115	0.0418994	0.245901	0.03573	0.304465	-0.66456	0.89643	1.56099	NA	0.439847	1.17406	0.0600663
RFI_80.180	115	0.00690443	0.138717	-0.00012	0.16208	-0.28094	0.5062	0.78714	NA	0.490158	0.915848	0.118962
Live_weight_before_slaughter	115	49.5948	4.6845	49.4	6.8	39	60.1	21.1	9.44555	0.107689	-0.435049	0.625333
Carcass_weight	115	26.1939	2.8262	26	3.4	19.2	33.4	14.2	10.7895	-0.012732	-0.137433	0.598368
Dressing_percentage	115	0.527724	0.0184381	0.527383	0.0214131	0.484848	0.571429	0.0865801	3.4939	-0.11711	-0.183111	0.255097
Shank_circumference	115	6.6287	0.343298	6.6	0.5	5.9	7.6	1.7	5.17897	0.604064	-0.016706	0.00115405
GR_value	114	1.75	0.410752	1.7	0.575	0.9	2.8	1.9	23.4715	0.0729178	-0.521844	0.277819
Eye_muscle_are_soft	115	13.4346	1.97277	13.196	2.242	10.023	19.355	9.332	14.6842	0.681172	0.457063	0.00331234
Eye_muscle_area.artifical	115	12.3735	1.85159	12.18	2.6005	7.854	16.884	9.03	14.9642	0.305895	-0.252913	0.23153
Wide_ocular_muscle_area	115	6.05043	0.479652	6	0.7	4.8	7.1	2.3	7.92755	-0.179196	-0.124074	0.17556
Deep_ocular_muscle_area	115	2.91739	0.332788	2.9	0.45	2.2	3.6	1.4	11.407	0.0689577	-0.75038	0.0553263
Thickness_of_backfat	65	0.304615	0.105224	0.3	0.15	0.1	0.65	0.55	34.5433	0.735888	1.20449	0.00403864
Rib_number	113	13.0973	0.352658	13	0	12	14	2	2.69259	1.41503	3.94558	1.58174e-18
Carcass_length	115	86.4261	3.39262	86	4.5	78	97	19	3.92545	0.0454653	0.466666	0.197389
Carcass_Chest_Circumference	115	75.8783	2.57909	76	4	69	83	14	3.39899	-0.0316645	0.087187	0.237712
Hip_circumference	115	64.9478	2.33149	64	4	60	71	11	3.58979	0.182445	-0.469694	0.00796648
The_weight_of_the_head	115	2.30083	0.17866	2.31	0.2575	1.78	2.815	1.035	7.76502	0.0465195	0.374098	0.961438
The_weight_of_the_hoof	115	1.05765	0.104923	1.055	0.14	0.745	1.33	0.585	9.9204	0.118677	0.230583	0.700318
Fur_weight	115	4.87217	0.58137	4.8	0.7	3.6	7.5	3.9	11.9325	1.0198	3.10412	0.000160306
The_weight_of_heart	115	0.205348	0.0243397	0.2	0.03	0.15	0.29	0.14	11.8529	0.57362	0.742822	0.0405646
The_weight_of_liver	115	0.905609	0.103314	0.895	0.1375	0.7	1.18	0.48	11.4082	0.407727	-0.246462	0.0728075
The_weight_of_spleen	115	0.0639217	0.012643	0.065	0.015	0.045	0.115	0.07	19.7788	1.5246	3.22378	8.48635e-09
The_weight_of_lung	115	0.572261	0.101364	0.56	0.125	0.4	0.995	0.595	17.7129	1.33596	3.06169	2.59502e-06
The_weight_of_kidney	115	0.134783	0.014333	0.135	0.02	0.1	0.17	0.07	10.6342	0.0785236	-0.531794	0.0578493
The_weight_of_tail_fat	115	1.12987	0.367007	1.15	0.4925	0.14	1.91	1.77	32.4822	-0.1572	-0.372313	0.743446
The_weight_of_perirenal_fat	115	0.471809	0.202973	0.45	0.275	0.105	1.16	1.055	43.0202	0.628931	0.398535	0.014193
The_weight_of_greater_omentum_fat	114	0.906535	0.331217	0.8975	0.3775	0.25	1.86	1.61	36.5366	0.607058	0.291945	0.00910446
Total.fat.weight	113	2.49839	0.655972	2.52	0.955	0.91	4.06	3.15	26.2558	0.0710642	-0.555571	0.534371
The_relative_weight_of_tail_fat.body_weight.	115	0.022599	0.00657192	0.0233981	0.00889641	0.00265655	0.0370874	0.0344308	29.0805	-0.479625	0.142111	0.176503
The_relative_weight_of_tail_fat.Carcass.	115	0.0428896	0.0122489	0.043985	0.0158369	0.00510949	0.0729008	0.0677913	28.559	-0.443503	0.319948	0.308694
The_relative_weight_of_perirenal_fat.body_weight.	114	0.00941624	0.0038608	0.00916518	0.00497822	0.00218295	0.0220114	0.0198284	41.0015	0.601602	0.265951	0.0185525
The_relative_weight_of_perirenal_fat.Carcass.	114	0.017861	0.00716735	0.017759	0.00918763	0.00423387	0.0423358	0.0381019	40.1284	0.578075	0.347465	0.0299685
The_relative_weight_of_greater_omentum_fat.body_weight.	114	0.0180715	0.00603254	0.0179038	0.00727695	0.0051975	0.0407895	0.035592	33.3816	0.732128	1.34243	0.0092075
The_relative_weight_of_greater_omentum_fat.Carcass.	114	0.0343306	0.0113367	0.0337715	0.0126947	0.0100806	0.0738095	0.0637289	33.0221	0.664876	0.876463	0.0183885
The_relative_weight_of_Total.fat.weight.body_weight.	113	0.0499782	0.0111869	0.0495247	0.0184308	0.0213115	0.0731193	0.0518078	22.3836	-0.00761259	-0.696102	0.207689
The_relative_weight_of_Total.fat.weight.Carcass.	113	0.0949033	0.0203706	0.0943262	0.0335317	0.0429245	0.135496	0.0925717	21.4646	-0.0671772	-0.70362	0.140422
The_relative_weight_of_the_head	115	0.0465524	0.00297898	0.0459251	0.00439284	0.0414676	0.0531991	0.0117315	6.39919	0.330796	-0.66218	0.0124449
The_relative_weight_of_the_hoof	115	0.0213718	0.00151298	0.0213115	0.00162316	0.0139513	0.0245322	0.0105809	7.07936	-0.748015	4.13366	3.25719e-05
The_relative_weight_of_fur	115	0.0983572	0.00832862	0.0986842	0.0105774	0.0809129	0.135135	0.0542223	8.46773	0.658295	2.40539	0.00427102
The_relative_weight_of_heart	115	0.00414984	0.00040052	0.00415194	0.000480802	0.00320388	0.00514286	0.00193897	9.65146	0.207838	0.0943415	0.313711
The_relative_weight_of_liver	115	0.0182953	0.00160543	0.0182672	0.00203086	0.0138889	0.0229126	0.00902373	8.77507	0.107501	0.509328	0.707622
The_relative__weight_of_spleen	115	0.00129579	0.000263332	0.0012605	0.000268258	0.000831947	0.00248244	0.00165049	20.3222	1.61519	4.30327	1.09106e-07
The_relative_weight_of_lung	115	0.0115845	0.00204986	0.0110424	0.00211941	0.0078203	0.0224099	0.0145896	17.6949	1.77294	6.0173	2.04803e-08
The_relative_weight_of_kidney	115	0.0027282	0.000282332	0.00267686	0.000336996	0.00223735	0.00368304	0.00144568	10.3486	0.922622	1.20188	0.000222577
The_weight_of_rumen	111	813.797	105.844	813.74	133.565	578.17	1169.11	590.94	13.0062	0.402617	0.332039	0.48158
The_weight_of_reticulum	114	126.317	19.958	125.15	24.26	60.44	198.32	137.88	15.7999	0.0669344	1.27626	0.165487
The_weight_of_omasum	113	129.067	24.9951	126.42	33.76	81.81	205.43	123.62	19.366	0.585975	0.281859	0.0297074
The_weight_of_abomasum	114	169.925	29.7485	167.975	42.6525	106.92	274.52	167.6	17.5068	0.583075	0.590787	0.0313625
The_weight_of_stomach	107	1238.48	142.721	1235.74	190.715	924.16	1721.54	797.38	11.5239	0.356512	0.360399	0.396139
The_relative_weight_of_rumen.body.	111	0.0164496	0.00170834	0.0162123	0.00228654	0.0126301	0.0223159	0.00968576	10.3853	0.541968	0.920637	0.052985
The_relative_weight_of_rumen.stomach.	107	0.657518	0.0259657	0.658377	0.0364369	0.586267	0.717892	0.131625	3.94905	-0.0994597	-0.172805	0.592263
The_relative_weight_of_reticulum.body.	114	0.00255532	0.000401773	0.00252182	0.000469724	0.00134911	0.00371386	0.00236475	15.723	0.0124773	0.958672	0.284317
The_relative_weight_of_reticulum.stomach.	107	0.102559	0.015714	0.103296	0.0202397	0.0502361	0.142737	0.0925008	15.3219	-0.0906725	0.956572	0.17969
The_relative_weight_of_omasum.body.	113	0.00260389	0.000459508	0.00255597	0.000572897	0.00159163	0.00376977	0.00217814	17.647	0.400558	-0.0277324	0.138802
The_relative_weight_of_omasum.stomach.	107	0.103632	0.0161731	0.105094	0.0224684	0.0559255	0.142832	0.0869061	15.6064	0.0440958	-0.0636417	0.431989
The_relative_weight_of_abomasum.body.	114	0.00344006	0.000596824	0.00329383	0.000803023	0.00242455	0.00495748	0.00253293	17.3492	0.542076	-0.421175	0.00304796
The_relative_weight_of_abomasum.stomach.	107	0.136292	0.0193895	0.133274	0.0255699	0.0971941	0.188944	0.0917495	14.2265	0.482778	-0.132833	0.0900657
The_relative_weight_of_stomach.body.	107	0.0249894	0.0022754	0.024749	0.00341338	0.0203878	0.0322678	0.01188	9.10547	0.474703	0.304949	0.104673
The_relative_weight_of_stomach.digestive_tract.	90	0.469562	0.0246247	0.469257	0.0292831	0.409845	0.545593	0.135747	5.24418	0.227005	0.961867	0.291169
The_weight_of_duodenum	106	42.7592	7.40794	42.435	8.3275	24.96	59.63	34.67	17.3248	0.0393281	-0.287524	0.811354
The_weight_of_jejunum	114	854.393	99.5467	863.45	137.33	607.05	1142.45	535.4	11.6512	0.165899	0.185417	0.37975
The_weight_of_ileum	115	31.3283	6.05653	30.25	7.74	19.26	48.19	28.93	19.3325	0.560929	0.0975591	0.0232122
The_weight_of_cecum	110	58.9192	9.46333	58.095	13.315	33.27	81.96	48.69	16.0615	0.054411	-0.17138	0.908718
The_weight_of_colon	111	427.376	48.7539	424.04	57.345	313.03	544.7	231.67	11.4077	0.228647	-0.0382085	0.373446
The_total_weight_of_intestinal_tract	98	1420.33	130.956	1429.14	178.868	1130.95	1768.08	637.13	9.22011	0.0916006	-0.274162	0.875062
The_total_weight_of_digestive_tract	90	2666.1	239.937	2669.88	260.907	2127.06	3346.46	1219.4	8.99954	0.19034	0.325149	0.434688
The_relative_weight_of_duodenum.body.	106	0.000868222	0.000176876	0.000877534	0.000206248	0.000457534	0.00132795	0.000870415	20.3722	0.150304	-0.00511331	0.792621
The_relative_weight_of_duodenum.intestinal_tract.	98	0.0305775	0.00543779	0.0307467	0.00537253	0.0161003	0.0427868	0.0266866	17.7836	-0.115539	0.207044	0.225467
The_relative_weight_of_duodenum.digestive_tract.	90	0.0161927	0.00286653	0.016192	0.00283502	0.00893475	0.0237069	0.0147721	17.7026	0.140338	0.451302	0.274286
The_relative_weight_of_jejunum.body.	114	0.0172756	0.00205373	0.0172114	0.00256913	0.0111181	0.0231749	0.0120567	11.8881	0.153693	0.699282	0.509901
The_relative_weight_of_jejunum.intestinal_tract.	98	0.604048	0.0295795	0.602946	0.0412493	0.514188	0.688389	0.174201	4.89687	0.236255	0.720747	0.169002
The_relative_weight_of_jejunum.digestive_tract.	90	0.320484	0.0242425	0.318056	0.0291901	0.252991	0.382017	0.129027	7.56434	0.184515	0.407814	0.14064
The_relative_weight_of_ileum.body.	115	0.000634619	0.000121617	0.000642511	0.000153806	0.000379882	0.00103463	0.000654752	19.1637	0.346914	0.0688507	0.261014
The_relative_weight_of_ileum.intestinal_tract.	98	0.0224967	0.00413092	0.0227429	0.00611648	0.0124917	0.0324005	0.0199088	18.3624	0.0927607	-0.510445	0.638813
The_relative_weight_of_ileum.digestive_tract.	90	0.0119364	0.00223611	0.012019	0.00285214	0.00655095	0.0172214	0.0106704	18.7335	0.129728	-0.492881	0.279136
The_relative_weight_of_cecum.body.	110	0.00119544	0.00019264	0.00118031	0.000247631	0.000770139	0.00176269	0.000992551	16.1146	0.298993	0.290687	0.537228
The_relative_weight_of_cecum.intestinal_tract.	98	0.0413123	0.00654883	0.0406296	0.00809886	0.0277917	0.0623581	0.0345665	15.852	0.57221	0.806943	0.0654042
The_relative_weight_of_cecum.digestive_tract.	90	0.0220209	0.00351099	0.0218423	0.00405905	0.0152095	0.0320639	0.0168544	15.9438	0.3474	0.0217916	0.347315
The_relative_weight_of_colon.body.	111	0.00865086	0.00099277	0.00855685	0.00111871	0.00661413	0.0118675	0.00525332	11.476	0.784918	1.06089	0.00345046
The_relative_weight_of_colon.intestinal_tract.	98	0.301566	0.0240626	0.305107	0.0307795	0.224359	0.363315	0.138956	7.97924	-0.396468	0.76133	0.310488
The_relative_weight_of_colon.digestive_tract.	90	0.159804	0.013876	0.158735	0.0173088	0.11814	0.193683	0.0755426	8.68316	-0.0327594	0.394883	0.757815
The_relative_weight_of_intestinal_tract.body.	98	0.0286908	0.00255934	0.0286723	0.00287569	0.0216227	0.037731	0.0161083	8.92041	0.269006	1.52047	0.0701719
The_relative_weight_of_intestinal_tract.digestive_tract.	90	0.530438	0.0246247	0.530743	0.0292831	0.454407	0.590155	0.135747	4.64233	-0.227005	0.961867	0.291169
The_relative_weight_of_digestive_tract.body.	90	0.0537093	0.00401531	0.0532087	0.00480888	0.042052	0.0692146	0.0271626	7.47601	0.758062	2.25897	0.00353141
The_length_of_duodenum	106	82.3585	16.0239	83	23	42	113	71	19.4563	-0.335305	-0.362875	0.20086
The_length_of_jejunum	114	27.5635	2.62454	27.54	3.695	20.61	34.1	13.49	9.52178	-0.133036	-0.072313	0.924306
The_length_of_ileum	113	58.5398	13.8113	58	17	31	93	62	23.5929	0.471045	-0.191418	0.0321705
The_length_of_cecum	115	30.8435	4.42202	30	6	20	42	22	14.337	-0.0771019	-0.312442	0.263918
The_length_of_colon	114	7.41325	0.835749	7.5	1.03	5	9.34	4.34	11.2737	-0.329881	0.223541	0.526402
The_total_length_of_intestinal_tract	102	207.954	24.0558	207.58	30.815	154.36	258.6	104.24	11.5678	0.166001	-0.490581	0.40357
The_relative_length_of_duodenum.intestinal_tract.	102	0.396913	0.0559164	0.399919	0.0622612	0.239945	0.523018	0.283073	14.0878	-0.244539	0.235667	0.373756
The_relative_length_of_jejunum.intestinal_tract.	102	0.133841	0.0193907	0.134043	0.0291105	0.0842221	0.2	0.115778	14.4879	0.278072	0.342165	0.486608
The_relative_length_of_ileum.intestinal_tract.	102	0.283327	0.0477882	0.283624	0.0692075	0.152958	0.381536	0.228578	16.8668	-0.0587179	-0.332656	0.792251
The_relative_length_of_cecum.intestinal_tract.	102	0.149799	0.023109	0.148315	0.0249361	0.103704	0.23125	0.127546	15.4266	0.802549	1.51736	0.00393183
The_relative_length_of_colon.intestinal_tract.	102	0.0361207	0.00545831	0.0364058	0.00716126	0.0248314	0.0511039	0.0262725	15.1113	0.203086	0.124881	0.420159
The_pH_of_rumen_contents	115	6.26313	0.32708	6.31	0.435	5.13	6.99	1.86	5.22231	-0.576426	0.841575	0.0292959
RBC.M.uL.	114	14.3422	1.21699	14.26	1.4425	11.59	17.39	5.8	8.48536	0.248404	-0.231296	0.37615
HGB.g.dL.	114	12.0526	0.693486	12	0.8	10.5	14.2	3.7	5.75381	0.219758	0.0598814	0.370853
HCT.per.	114	30.6868	2.63602	30.7	3.375	25.3	39.1	13.8	8.59006	0.390048	0.189838	0.133858
MCV.fL.	114	21.5149	2.32403	21.25	2.5	16.3	28.5	12.2	10.8019	0.765988	1.02139	0.00171498
MCH.pg.	114	8.43158	0.462068	8.4	0.6	7.4	9.6	2.2	5.48021	0.529997	0.178028	0.00596272
MCHC.g.dL.	114	39.4377	2.5059	39.1	3.475	33.5	47.7	14.2	6.35407	0.19315	0.436674	0.430416
RDW.SD.fL.	113	25.7823	2.64664	25.7	3.4	18.4	32.7	14.3	10.2653	0.157559	-0.0983147	0.820759
RDW.CV.per.	114	44.2053	2.53534	44.55	3.175	39	52.4	13.4	5.73537	0.220966	0.0834564	0.37576
RET.n..K.uL.	114	5.21053	2.43294	4.95	3.15	1.4	12	10.6	46.6927	0.596429	0.299815	0.00221412
RETper.per.	114	0.0368421	0.0177153	0.035	0.02	0.01	0.08	0.07	48.0845	0.569581	0.121982	2.51244e-05
PLT.K.uL.	114	624.246	120.767	616.5	128.75	352	975	623	19.3461	0.426097	0.222769	0.116469
MPV.fL.	114	8.10789	0.446846	8	0.5	7.2	9.7	2.5	5.51125	0.770758	1.10731	0.00275939
PCT.per.	114	0.506842	0.107253	0.49	0.1275	0.29	0.8	0.51	21.161	0.650691	0.0487853	0.00195735
WBC.K.uL.	114	12.2796	2.24273	12.305	3.0675	6.66	18.88	12.22	18.2638	-0.0168052	-0.0331458	0.977477
NEUT.n..K.uL.	114	4.8	1.48753	4.46	1.7675	1.9	11.52	9.62	30.9901	1.01962	2.5524	0.000116838
LYMPH.n..K.uL.	114	6.28526	1.44961	6.18	1.9625	2.04	10.36	8.32	23.0636	0.159431	0.301125	0.736107
MONO.n..K.uL.	114	0.970965	0.581718	0.89	0.7975	0.13	2.63	2.5	59.9114	0.921348	0.498013	1.45765e-05
EO.n..K.uL.	113	0.140708	0.0852173	0.14	0.1	0.02	0.51	0.49	60.5633	1.45588	3.46976	2.06019e-07
BASO.n..K.uL.	96	0.0996875	0.0873523	0.085	0.1325	0.01	0.33	0.32	87.6262	0.837051	-0.125684	3.97495e-07
NEUTper.per.	114	38.8561	8.39696	37.8	11.7	18.9	70.1	51.2	21.6104	0.706887	0.800554	0.00448881
LYMPHper.per.	114	51.4789	8.8544	51.3	13.2	18.2	74.8	56.6	17.2	-0.477564	0.901417	0.0576306
MONOper.per.	114	7.8386	4.21828	7.45	6.2	1.1	19.5	18.4	53.8142	0.609833	-0.159095	0.00182509
EOper.per.	113	1.13894	0.646479	1.1	0.7	0.2	3.7	3.5	56.7615	1.42362	3.04139	3.18377e-07
BASOper.per.	96	0.828125	0.700782	0.7	1.2	0.1	2.8	2.7	84.6227	0.734523	-0.18189	7.36639e-07
RET.He.pg.	114	14.3904	5.13658	13.05	4.125	8.6	31.3	22.7	35.6946	1.7737	2.78639	1.85592e-11
RBC.He.pg.	114	10.6658	0.361126	10.6	0.4	9.9	11.8	1.9	3.38584	0.870247	1.29769	0.000185809
Meat_color_45min_a	115	16.1937	1.39505	16.1517	1.76583	13.0583	19.8083	6.75	8.61472	0.334934	0.0531727	0.196098
Meat_color_45min_b	115	5.47795	0.749132	5.48	1.04333	3.63667	7.79333	4.15667	13.6754	0.226398	-0.0131633	0.873642
Meat_color_45min_l	115	35.1152	2.02881	35.0967	2.58333	30.62	40.34	9.72	5.77759	0.185063	-0.0106734	0.719304
Meat_color_24h_a	115	18.9198	2.11375	19.085	2.42417	13.8533	26.5833	12.73	11.1722	0.142719	1.05768	0.14536
Meat_color_24h_b	115	10.7819	2.12055	11.0883	2.8375	4.80167	16.4383	11.6367	19.6678	-0.354816	0.367649	0.232616
Meat_color_24h_l	115	38.4918	3.44275	38.8683	4.60417	29.3133	47.2833	17.97	8.94413	-0.172797	0.0165295	0.508693
Cooking_percentage	109	0.461337	0.0209758	0.460037	0.0286515	0.402432	0.512071	0.109639	4.54673	-0.191671	0.014667	0.666911
Drip_loss	113	0.0362634	0.0150953	0.032194	0.0138678	0.014477	0.0954514	0.0809745	41.6268	1.92731	4.21977	1.16937e-10
Water_loss_rate	115	0.293775	0.0563229	0.284371	0.07278	0.180135	0.421794	0.241659	19.1721	0.348548	-0.512434	0.0174149
Shear_force	115	62.2896	14.9629	64.286	20.2518	21.874	94.868	72.994	24.0215	-0.220229	-0.571921	0.0771277
The_pH_1_value_of_muscle_at_0h	111	6.29162	0.223448	6.32	0.305	5.74	6.79333	1.05333	3.55151	-0.303092	-0.561043	0.0833286
The_pH_24h_value_of_muscle_at_24h	113	5.31941	0.223839	5.26667	0.223333	4.97333	6.02667	1.05333	4.20797	1.29232	1.52549	1.16452e-07
Marbling.order.	115	2.16522	0.782825	2	1	0.5	4.5	4	36.1546	0.4253	0.166069	2.85841e-06
Muscle_color_score.order.	115	2.92609	0.879203	3	1	1	5	4	30.0471	0.140701	0.110304	0.000224076
the_weight_of_foreleg_1.kg.	115	1.732	0.172363	1.72	0.22	1.29	2.15	0.86	9.95169	0.309792	0.0934762	0.1204
the_weight_of_foreleg_2.kg.	115	1.77461	0.175661	1.77	0.215	1.38	2.28	0.9	9.89855	0.271586	-0.0207135	0.71187
the_weight_of_hind_leg_1.kg.	114	2.53649	0.243121	2.5	0.3175	2.06	3.45	1.39	9.58494	0.618058	0.951928	0.0177709
the_weight_of_hind_leg_2.kg.	115	2.536	0.231285	2.52	0.34	2.05	3.17	1.12	9.12006	0.272577	-0.187202	0.540946
the_weight_of_front_cavity.kg.	113	7.65229	0.869544	7.66	1.04	5.56	9.43	3.87	11.3632	-0.312794	-0.189511	0.120143
the_length_of_penis.cm.	47	34.8085	2.41272	34.5	3.5	31	40	9	6.93142	0.386223	-0.679252	0.102741
the_weight_of_penis.g.	47	40.1702	4.82889	39	6	29	52	23	12.0211	0.107685	-0.0624848	0.906409
the_number_of_caudal_vertebra	114	12.2982	1.15926	12	1.75	9	16	7	9.42625	0.191385	0.662629	3.36753e-06

## Sheet: Supplementary Table S2
Supplementary Table S2. Comprehensive comparisons of 229 host phenotypic traits between the E1 and E2 enterotypes.
Trait	E1_median	E2_median	Direction	Effect_Size	Signed_Effect_Size	ES_class	W_statistic	P_value	Significance	FDR_adjusted	FDR_Significance	logp	tax
The_weight_of_rumen	858.91	784.31	Group1 > Group2	0.392809	0.392809	Medium	2053	4.87E-04	***	0.111627	ns	3.31206	Organ & Digestive traits
The_weight_of_stomach	1293.32	1210.51	Group1 > Group2	0.372093	0.372093	Medium	1888	0.00115354	**	0.122592	ns	2.93797	Organ & Digestive traits
The_relative_weight_of_reticulum.stomach.	0.0976581	0.106191	Group1 < Group2	-0.361192	-0.361192	Medium	879	0.001606	**	0.122592	ns	2.79425	Organ & Digestive traits
The_weight_of_the_hoof	1.0975	1.035	Group1 > Group2	0.335787	0.335787	Medium	2086.5	0.00255835	**	0.133157	ns	2.59204	Organ & Digestive traits
Fur_weight	5	4.6	Group1 > Group2	0.319462	0.319462	Small	2061	0.00403129	**	0.137757	ns	2.39456	Organ & Digestive traits
The_total_weight_of_digestive_tract	2761.38	2618.16	Group1 > Group2	0.356451	0.356451	Medium	1330	0.00421091	**	0.137757	ns	2.37562	Organ & Digestive traits
The_weight_of_liver	0.935	0.875	Group1 > Group2	0.307298	0.307298	Small	2042	0.00577921	**	0.147049	ns	2.23813	Organ & Digestive traits
The_relative_weight_of_jejunum.body.	0.0165602	0.0175739	Group1 < Group2	-0.264935	-0.264935	Small	1132	0.0176975	*	0.240227	ns	1.75209	Organ & Digestive traits
The_relative_weight_of_rumen.stomach.	0.665836	0.653255	Group1 > Group2	0.268895	0.268895	Small	1746	0.0188825	*	0.240227	ns	1.72394	Organ & Digestive traits
The_relative_weight_of_reticulum.body.	0.00247078	0.00261616	Group1 < Group2	-0.236364	-0.236364	Small	1176	0.0343634	*	0.357692	ns	1.4639	Organ & Digestive traits
The_weight_of_kidney	0.14	0.135	Group1 > Group2	0.230794	0.230794	Small	1922.5	0.037164	*	0.370024	ns	1.42988	Organ & Digestive traits
The_relative_weight_of_stomach.digestive_tract.	0.477092	0.466528	Group1 > Group2	0.248343	0.248343	Small	1224	0.0462966	*	0.387588	ns	1.33445	Organ & Digestive traits
The_relative_weight_of_intestinal_tract.digestive_tract.	0.522908	0.533472	Group1 < Group2	-0.248343	-0.248343	Small	737	0.0462966	*	0.387588	ns	1.33445	Organ & Digestive traits
the_weight_of_hind_leg_1.kg.	2.56	2.45	Group1 > Group2	0.302326	0.302326	Small	1988	0.00702155	**	0.160794	ns	2.15357	Meat
the_weight_of_foreleg_2.kg.	1.8	1.73	Group1 > Group2	0.287132	0.287132	Small	2010.5	0.00991249	**	0.189163	ns	2.00382	Meat
Hip_circumference	66	64	Group1 > Group2	0.277209	0.277209	Small	1995	0.0118994	*	0.209613	ns	1.92447	Meat
the_weight_of_hind_leg_2.kg.	2.555	2.48	Group1 > Group2	0.269206	0.269206	Small	1982.5	0.0156357	*	0.238704	ns	1.80588	Meat
Carcass_weight	26.6	25.6	Group1 > Group2	0.237836	0.237836	Small	1933.5	0.0326915	*	0.356493	ns	1.48557	Meat
the_weight_of_foreleg_1.kg.	1.74	1.7	Group1 > Group2	0.223111	0.223111	Small	1910.5	0.0451415	*	0.387588	ns	1.34542	Meat
HGB.g.dL.	11.9	12.2	Group1 < Group2	-0.222732	-0.222732	Small	1186.5	0.0467245	*	0.387588	ns	1.33046	Haematological parameters
Live_weight_before_slaughter	51.15	48.2	Group1 > Group2	0.31306	0.31306	Small	2051	0.00493236	**	0.141189	ns	2.30695	Grow traits
MBW_160.180	15.016	14.4026	Group1 > Group2	0.298457	0.298457	Small	1936	0.00826611	**	0.172085	ns	2.0827	Grow traits
MBW_140.160	13.5811	13.0854	Group1 > Group2	0.275319	0.275319	Small	1901.5	0.0148496	*	0.238704	ns	1.82828	Grow traits
ADG_140.160	0.33	0.275	Group1 > Group2	0.267442	0.267442	Small	1853	0.0180505	*	0.240227	ns	1.74351	Grow traits
BW_160	43.65	41.2	Group1 > Group2	0.257042	0.257042	Small	1963.5	0.0209945	*	0.253039	ns	1.6779	Grow traits
MBW_80.180	11.8909	11.4355	Group1 > Group2	0.222077	0.222077	Small	1865.5	0.0478138	*	0.387588	ns	1.32045	Grow traits
ADFI_140.160	2.1325	1.965	Group1 > Group2	0.332468	0.332468	Medium	2052	0.00290737	**	0.133157	ns	2.5365	Feed efficiency
RFI_140.160	0.03465	-0.036115	Group1 > Group2	0.242208	0.242208	Small	1913	0.030146	*	0.345172	ns	1.52077	Feed efficiency
X160d_Intratail_width	16.125	15.5	Group1 > Group2	0.21863	0.21863	Small	1903.5	0.0490832	*	0.387588	ns	1.30907	Fat deposition
The_relative_weight_of_cecum.digestive_tract.	0.0209088	0.0223949	Group1 < Group2	-0.242223	-0.242223	Small	743	0.0519585	ns	0.390819	ns	1.28434	Organ & Digestive traits
Cannon_circumference_80	6.6	6.4	Group1 > Group2	0.215109	0.215109	Small	1898	0.0529056	ns	0.390819	ns	1.2765	Grow traits
The_weight_of_colon	434.81	420.185	Group1 > Group2	0.215458	0.215458	Small	1777	0.0569407	ns	0.407482	ns	1.24458	Organ & Digestive traits
Length_120	64	63	Group1 > Group2	0.208067	0.208067	Small	1887	0.0605028	ns	0.411402	ns	1.21822	Grow traits
The_relative_weight_of_rumen.body.	0.0165698	0.0159969	Group1 > Group2	0.210991	0.210991	Small	1785	0.0612223	ns	0.411402	ns	1.21309	Organ & Digestive traits
X160d_Outside_the_long_tail	24.415	23.83	Group1 > Group2	0.204866	0.204866	Small	1882	0.0652825	ns	0.411402	ns	1.1852	Fat deposition
X100d_Outside_the_long_tail	21	22	Group1 < Group2	-0.283472	-0.283472	Small	695	0.06567	ns	0.411402	ns	1.18263	Fat deposition
Birth_weight	4.51	4.2	Group1 > Group2	0.203905	0.203905	Small	1880.5	0.0672277	ns	0.411402	ns	1.17245	Grow traits
Length_160	71	70	Group1 > Group2	0.198464	0.198464	Small	1872	0.073942	ns	0.411402	ns	1.13111	Grow traits
Cannon_circumference_100	6.9	6.7	Group1 > Group2	0.198464	0.198464	Small	1872	0.074203	ns	0.411402	ns	1.12958	Grow traits
The_weight_of_duodenum	44.085	41.985	Group1 > Group2	0.207576	0.207576	Small	1594	0.0746513	ns	0.411402	ns	1.12696	Organ & Digestive traits
BW_180	48.5	47	Group1 > Group2	0.198464	0.198464	Small	1872	0.0748824	ns	0.411402	ns	1.12562	Grow traits
The_weight_of_the_head	2.325	2.28	Group1 > Group2	0.197183	0.197183	Small	1870	0.0767745	ns	0.411402	ns	1.11478	Organ & Digestive traits
The_relative_weight_of_jejunum.digestive_tract.	0.317795	0.320926	Group1 < Group2	-0.219786	-0.219786	Small	765	0.0778887	ns	0.411402	ns	1.10853	Organ & Digestive traits
ADG_120.140	0.34	0.3225	Group1 > Group2	0.19701	0.19701	Small	1801.5	0.079906	ns	0.411402	ns	1.09742	Grow traits
The_weight_of_heart	0.2075	0.2	Group1 > Group2	0.193982	0.193982	Small	1865	0.0808433	ns	0.411402	ns	1.09236	Organ & Digestive traits
The_relative__weight_of_spleen	0.00120758	0.00128713	Group1 < Group2	-0.193022	-0.193022	Small	1260.5	0.0832499	ns	0.41444	ns	1.07962	Organ & Digestive traits
X140d_Outside_the_long_tail	23.5	22.67	Group1 > Group2	0.189501	0.189501	Small	1858	0.08831	ns	0.42497	ns	1.05399	Fat deposition
the_weight_of_front_cavity.kg.	7.84	7.52	Group1 > Group2	0.191362	0.191362	Small	1793	0.0890767	ns	0.42497	ns	1.05024	Meat
Dressing_percentage	0.524831	0.529301	Group1 < Group2	-0.18822	-0.18822	Small	1268	0.0912284	ns	0.426353	ns	1.03987	Meat
Shank_circumference	6.65	6.5	Group1 > Group2	0.184699	0.184699	Small	1850.5	0.0954827	ns	0.435913	ns	1.02008	Meat
X120d_Intratail_length	18	17.33	Group1 > Group2	0.185719	0.185719	Small	1810	0.097081	ns	0.435913	ns	1.01287	Fat deposition
X140d_Intratail_width	15	14	Group1 > Group2	0.183419	0.183419	Small	1848.5	0.0993272	ns	0.437422	ns	1.00293	Fat deposition
The_pH_1_value_of_muscle_at_0h	6.37667	6.28	Group1 > Group2	0.180469	0.180469	Small	1710.5	0.112489	ns	0.485225	ns	0.948889	Meat
the_weight_of_penis.g.	42	39	Group1 > Group2	0.274436	0.274436	Small	339	0.11442	ns	0.485225	ns	0.941498	Organ & Digestive traits
X180d_Outside_the_long_tail	26.25	25.5	Group1 > Group2	0.172855	0.172855	Small	1832	0.119885	ns	0.499157	ns	0.921235	Fat deposition
Scrotal_circumference_100	17.5	17	Group1 > Group2	0.171962	0.171962	Small	1789	0.124425	ns	0.508811	ns	0.905091	Reproduction
MBW_120.140	11.853	11.6173	Group1 > Group2	0.171362	0.171362	Small	1746.5	0.129743	ns	0.514433	ns	0.886917	Grow traits
The_relative_weight_of_intestinal_tract.body.	0.0284979	0.0290004	Group1 < Group2	-0.182456	-0.182456	Small	932	0.130293	ns	0.514433	ns	0.885078	Organ & Digestive traits
EO.n..K.uL.	0.12	0.15	Group1 < Group2	-0.169685	-0.169685	Small	1238	0.132931	ns	0.515953	ns	0.876373	Haematological parameters
The_relative_weight_of_cecum.body.	0.00112349	0.00120127	Group1 < Group2	-0.169039	-0.169039	Small	1197	0.136606	ns	0.521378	ns	0.864532	Organ & Digestive traits
The_relative_weight_of_stomach.body.	0.0248544	0.0246894	Group1 > Group2	0.169331	0.169331	Small	1609	0.139587	ns	0.522959	ns	0.855154	Organ & Digestive traits
The_pH_of_rumen_contents	6.375	6.25	Group1 > Group2	0.163252	0.163252	Small	1817	0.142963	ns	0.522959	ns	0.844775	Organ & Digestive traits
X100d_Intratail_length	16	17	Group1 < Group2	-0.2253	-0.2253	Small	663.5	0.143871	ns	0.522959	ns	0.842027	Fat deposition
The_relative_weight_of_duodenum.intestinal_tract.	0.0316125	0.0306383	Group1 > Group2	0.174561	0.174561	Small	1339	0.147806	ns	0.52695	ns	0.830308	Organ & Digestive traits
The_weight_of_omasum	127.845	124.42	Group1 > Group2	0.161397	0.161397	Small	1763	0.149957	ns	0.52695	ns	0.824034	Organ & Digestive traits
The_weight_of_tail_fat	1.2575	1.095	Group1 > Group2	0.159731	0.159731	Small	1811.5	0.151872	ns	0.52695	ns	0.818522	Fat deposition
The_total_weight_of_intestinal_tract	1462.22	1406.69	Group1 > Group2	0.171053	0.171053	Small	1335	0.156144	ns	0.533686	ns	0.806474	Organ & Digestive traits
Cannon_circumference_160	7.875	7.75	Group1 > Group2	0.153649	0.153649	Small	1802	0.167067	ns	0.562621	ns	0.777111	Grow traits
BW_140	36.95	36.4	Group1 > Group2	0.151088	0.151088	Small	1798	0.175241	ns	0.575836	ns	0.756364	Grow traits
Carcass_length	87	86	Group1 > Group2	0.150128	0.150128	Small	1796.5	0.17602	ns	0.575836	ns	0.754438	Meat
The_length_of_duodenum	86	81	Group1 > Group2	0.154221	0.154221	Small	1538	0.18339	ns	0.582574	ns	0.736625	Organ & Digestive traits
Meat_color_45min_l	34.8158	35.2917	Group1 < Group2	-0.147567	-0.147567	Small	1331.5	0.185655	ns	0.582574	ns	0.731294	Meat
The_relative_weight_of_colon.intestinal_tract.	0.309299	0.300059	Group1 > Group2	0.159649	0.159649	Small	1322	0.185711	ns	0.582574	ns	0.731161	Organ & Digestive traits
Water_loss_rate	0.281528	0.289131	Group1 < Group2	-0.144046	-0.144046	Negligible	1337	0.196398	ns	0.596445	ns	0.706862	Meat
Marbling.order.	2	2	Equal	0.137324	-0.137324	Negligible	1776.5	0.198032	ns	0.596445	ns	0.703265	Meat
Chest_160	77	77	Equal	0.142125	-0.142125	Negligible	1784	0.199875	ns	0.596445	ns	0.699242	Grow traits
The_relative_weight_of_the_head	0.0458554	0.0465138	Group1 < Group2	-0.142125	-0.142125	Negligible	1340	0.202442	ns	0.596445	ns	0.693699	Organ & Digestive traits
RFI_120.140	-0.04642	0.0073	Group1 < Group2	-0.145588	-0.145588	Negligible	1162	0.208937	ns	0.596445	ns	0.679984	Feed efficiency
FCR_140.160	6.4697	7.64815	Group1 < Group2	-0.141557	-0.141557	Negligible	1273.5	0.210073	ns	0.596445	ns	0.67763	Feed efficiency
Length_140	66.5	67.5	Group1 < Group2	-0.138924	-0.138924	Negligible	1345	0.210671	ns	0.596445	ns	0.676396	Grow traits
Deep_ocular_muscle_area	3	2.8	Group1 > Group2	0.138924	0.138924	Negligible	1779	0.210969	ns	0.596445	ns	0.67578	Meat
NEUT.n..K.uL.	4.16	4.55	Group1 < Group2	-0.134622	-0.134622	Negligible	1321	0.230717	ns	0.610633	ns	0.63692	Haematological parameters
X160d_Intratail_length	21	20.5	Group1 > Group2	0.131242	0.131242	Negligible	1767	0.237608	ns	0.610633	ns	0.62414	Fat deposition
The_weight_of_abomasum	172.57	164.26	Group1 > Group2	0.132001	0.132001	Negligible	1728	0.239955	ns	0.610633	ns	0.61987	Organ & Digestive traits
Hight_80	54.25	54	Group1 > Group2	0.130282	0.130282	Negligible	1765.5	0.240363	ns	0.610633	ns	0.619133	Grow traits
The_relative_weight_of_cecum.intestinal_tract.	0.0393034	0.0417076	Group1 < Group2	-0.141228	-0.141228	Negligible	979	0.241898	ns	0.610633	ns	0.616367	Organ & Digestive traits
MBW_80.100	8.38865	8.24911	Group1 > Group2	0.129641	0.129641	Negligible	1764.5	0.245054	ns	0.610633	ns	0.610738	Grow traits
FCR_160.180	8.25	7.60938	Group1 > Group2	0.133236	0.133236	Negligible	1556.5	0.247949	ns	0.610633	ns	0.605638	Feed efficiency
BW_80	18.975	18.25	Group1 > Group2	0.128361	0.128361	Negligible	1762.5	0.2497	ns	0.610633	ns	0.602581	Grow traits
LYMPHper.per.	53.3	50.2	Group1 > Group2	0.129053	0.129053	Negligible	1723.5	0.250625	ns	0.610633	ns	0.600975	Haematological parameters
Muscle_color_score.order.	3	3	Equal	-0.1242	-0.1242	Negligible	1368	0.252478	ns	0.610633	ns	0.597777	Meat
BW_100	24.2	23.7	Group1 > Group2	0.127401	0.127401	Negligible	1761	0.253295	ns	0.610633	ns	0.596374	Grow traits
Scrotal_circumference_140	23.5	23.33	Group1 > Group2	0.12644	0.12644	Negligible	1759.5	0.256045	ns	0.610633	ns	0.591683	Reproduction
The_relative_weight_of_jejunum.intestinal_tract.	0.596073	0.605064	Group1 < Group2	-0.136842	-0.136842	Negligible	984	0.256879	ns	0.610633	ns	0.590271	Organ & Digestive traits
RBC.M.uL.	14.18	14.38	Group1 < Group2	-0.126761	-0.126761	Negligible	1333	0.259162	ns	0.610633	ns	0.586429	Haematological parameters
Chest_180	82.5	84	Group1 < Group2	-0.12516	-0.12516	Negligible	1366.5	0.260354	ns	0.610633	ns	0.584436	Grow traits
WBC.K.uL.	11.87	12.41	Group1 < Group2	-0.125778	-0.125778	Negligible	1334.5	0.262894	ns	0.610633	ns	0.580219	Haematological parameters
HCT.per.	30.3	31.4	Group1 < Group2	-0.124795	-0.124795	Negligible	1336	0.266551	ns	0.610633	ns	0.574219	Haematological parameters
Shear_force	64.7194	63.838	Group1 > Group2	0.12356	0.12356	Negligible	1755	0.267975	ns	0.610633	ns	0.571905	Meat
Carcass_Chest_Circumference	76	76	Equal	0.122279	-0.122279	Negligible	1753	0.26934	ns	0.610633	ns	0.569699	Meat
X160d_the_tail_circumference	28	27	Group1 > Group2	0.122727	0.122727	Negligible	1729	0.272038	ns	0.610633	ns	0.56537	Fat deposition
Length_80	57	56	Group1 > Group2	0.121319	0.121319	Negligible	1751.5	0.27419	ns	0.610633	ns	0.561949	Grow traits
Weaning_weight	16.05	14.95	Group1 > Group2	0.121319	0.121319	Negligible	1751.5	0.276652	ns	0.610633	ns	0.558066	Grow traits
The_relative_length_of_cecum.intestinal_tract.	0.14356	0.149859	Group1 < Group2	-0.128226	-0.128226	Negligible	1081	0.277318	ns	0.610633	ns	0.557022	Organ & Digestive traits
RET.He.pg.	14	12.8	Group1 > Group2	0.120865	0.120865	Negligible	1711	0.281934	ns	0.614885	ns	0.549852	Haematological parameters
X100d_the_tail_circumference	23	22	Group1 > Group2	0.163435	0.163435	Small	453	0.289822	ns	0.626126	ns	0.537868	Fat deposition
Drip_loss	0.0301539	0.0342093	Group1 < Group2	-0.118272	-0.118272	Negligible	1327	0.293869	ns	0.628935	ns	0.531846	Meat
Eye_muscle_area.artifical	12.5195	11.97	Group1 > Group2	0.114597	0.114597	Negligible	1741	0.304293	ns	0.64182	ns	0.516708	Meat
MBW_100.120	10.0429	10.0292	Group1 > Group2	0.113316	0.113316	Negligible	1739	0.30977	ns	0.64182	ns	0.50896	Grow traits
Cannon_circumference_180	8.15	8	Group1 > Group2	0.112676	0.112676	Negligible	1738	0.310062	ns	0.64182	ns	0.508552	Grow traits
Cannon_circumference_140	7.5	7.5	Equal	0.112676	-0.112676	Negligible	1738	0.311101	ns	0.64182	ns	0.507099	Grow traits
The_relative_weight_of_lung	0.0109309	0.0111009	Group1 < Group2	-0.111396	-0.111396	Negligible	1388	0.318084	ns	0.650369	ns	0.497458	Organ & Digestive traits
ADFI_80.180	1.72785	1.722	Group1 > Group2	0.107554	0.107554	Negligible	1730	0.335108	ns	0.679113	ns	0.474815	Feed efficiency
GR_value	1.7	1.8	Group1 < Group2	-0.10678	-0.10678	Negligible	1363.5	0.340784	ns	0.681623	ns	0.467521	Meat
RDW.SD.fL.	26	25.6	Group1 > Group2	0.107311	0.107311	Negligible	1651	0.343197	ns	0.681623	ns	0.464456	Haematological parameters
The_relative_length_of_duodenum.intestinal_tract.	0.415538	0.393466	Group1 > Group2	0.11129	0.11129	Negligible	1378	0.345973	ns	0.681623	ns	0.460958	Organ & Digestive traits
Meat_color_24h_l	38.255	39.0633	Group1 < Group2	-0.104673	-0.104673	Negligible	1398.5	0.348253	ns	0.681623	ns	0.458106	Meat
ADG_160.180	0.255	0.28	Group1 < Group2	-0.105102	-0.105102	Negligible	1315.5	0.354491	ns	0.687953	ns	0.450394	Grow traits
X180d_the_tail_circumference	32	34	Group1 < Group2	-0.100832	-0.100832	Negligible	1404.5	0.365724	ns	0.696108	ns	0.436847	Fat deposition
BASOper.per.	0.9	0.7	Group1 > Group2	0.108893	0.108893	Negligible	1222	0.365785	ns	0.696108	ns	0.436774	Haematological parameters
The_relative_weight_of_tail_fat.Carcass.	0.0472739	0.0434685	Group1 > Group2	0.100512	0.100512	Negligible	1719	0.367813	ns	0.696108	ns	0.434373	Fat deposition
The_relative_weight_of_ileum.body.	5.99E-04	6.55E-04	Group1 < Group2	-0.0992318	-0.0992318	Negligible	1407	0.373967	ns	0.701954	ns	0.427167	Organ & Digestive traits
FCR_80.100	4.90323	4.8209	Group1 > Group2	0.0989191	0.0989191	Negligible	1677.5	0.378933	ns	0.705493	ns	0.421438	Feed efficiency
X120d_the_tail_circumference	24	23.5	Group1 > Group2	0.0979365	0.0979365	Negligible	1676	0.382605	ns	0.706586	ns	0.417249	Fat deposition
Scrotal_circumference_160	24.25	24.5	Group1 < Group2	0.0957106	-0.0957106	Negligible	1711.5	0.390455	ns	0.711266	ns	0.408429	Reproduction
EOper.per.	1	1.1	Group1 < Group2	-0.0969148	-0.0969148	Negligible	1346.5	0.391351	ns	0.711266	ns	0.407433	Haematological parameters
The_relative_weight_of_duodenum.digestive_tract.	0.0163759	0.015964	Group1 > Group2	0.105558	0.105558	Negligible	1084	0.398315	ns	0.717016	ns	0.399773	Organ & Digestive traits
The_weight_of_perirenal_fat	0.4875	0.42	Group1 > Group2	0.09379	0.09379	Negligible	1708.5	0.400777	ns	0.717016	ns	0.397097	Fat deposition
BW_120	30.65	30.3	Group1 > Group2	0.0931498	0.0931498	Negligible	1707.5	0.403995	ns	0.717169	ns	0.393624	Grow traits
NEUTper.per.	37.6	38	Group1 < Group2	-0.0930233	-0.0930233	Negligible	1384.5	0.408061	ns	0.718814	ns	0.389275	Haematological parameters
MPV.fL.	8	8.1	Group1 < Group2	-0.0920406	-0.0920406	Negligible	1386	0.411303	ns	0.718996	ns	0.385838	Haematological parameters
X180d_Intratail_length	22	22	Equal	0.0902689	-0.0902689	Negligible	1703	0.416964	ns	0.72337	ns	0.379901	Fat deposition
The_relative_length_of_colon.intestinal_tract.	0.035814	0.0364058	Group1 < Group2	-0.0943548	-0.0943548	Negligible	1123	0.424583	ns	0.72877	ns	0.372037	Organ & Digestive traits
ADFI_80.100	1.38325	1.325	Group1 > Group2	0.0886684	0.0886684	Negligible	1700.5	0.427118	ns	0.72877	ns	0.369452	Feed efficiency
X140d_Intratail_length	19.75	19.33	Group1 > Group2	0.0880282	0.0880282	Negligible	1699.5	0.429624	ns	0.72877	ns	0.366911	Fat deposition
Cannon_circumference_120	7.3	7.25	Group1 > Group2	0.0861076	0.0861076	Negligible	1696.5	0.438695	ns	0.738686	ns	0.357837	Grow traits
The_relative_weight_of_the_hoof	0.0213836	0.0212555	Group1 > Group2	0.0851472	0.0851472	Negligible	1695	0.445779	ns	0.742537	ns	0.35088	Organ & Digestive traits
ADG_80.180	0.2995	0.2908	Group1 > Group2	0.0848271	0.0848271	Negligible	1694.5	0.447467	ns	0.742537	ns	0.349239	Grow traits
Chest_120	69	70	Group1 < Group2	-0.0829065	-0.0829065	Negligible	1432.5	0.4564	ns	0.75191	ns	0.340655	Grow traits
MONO.n..K.uL.	0.85	0.93	Group1 < Group2	-0.0825418	-0.0825418	Negligible	1400.5	0.463107	ns	0.757511	ns	0.334319	Haematological parameters
Hight_160	65	65	Equal	0.0797055	-0.0797055	Negligible	1686.5	0.471561	ns	0.762398	ns	0.326463	Grow traits
The_relative_weight_of_liver	0.0183752	0.018128	Group1 > Group2	0.0797055	0.0797055	Negligible	1686.5	0.475499	ns	0.762398	ns	0.32285	Organ & Digestive traits
Total.fat.weight	2.515	2.5325	Group1 < Group2	0.0803987	-0.0803987	Negligible	1626	0.476083	ns	0.762398	ns	0.322318	Fat deposition
The_relative_weight_of_tail_fat.body_weight.	0.0243748	0.0229167	Group1 > Group2	0.0774648	0.0774648	Negligible	1683	0.488049	ns	0.770901	ns	0.311536	Fat deposition
ADG_100.120	0.3075	0.31	Group1 < Group2	-0.0768246	-0.0768246	Negligible	1442	0.49139	ns	0.770901	ns	0.308574	Grow traits
The_weight_of_lung	0.565	0.545	Group1 > Group2	0.0768246	0.0768246	Negligible	1682	0.491491	ns	0.770901	ns	0.308484	Organ & Digestive traits
The_relative_weight_of_ileum.digestive_tract.	0.0114198	0.0123088	Group1 < Group2	-0.0841407	-0.0841407	Negligible	898	0.501312	ns	0.775754	ns	0.299892	Organ & Digestive traits
The_length_of_jejunum	27.9	27.5	Group1 > Group2	0.0753247	0.0753247	Negligible	1656	0.50136	ns	0.775754	ns	0.29985	Organ & Digestive traits
RFI_160.180	0.02006	0.03573	Group1 < Group2	-0.0736236	-0.0736236	Negligible	1447	0.509968	ns	0.783776	ns	0.292457	Feed efficiency
The_relative_weight_of_fur	0.0992913	0.0979592	Group1 > Group2	0.0726633	0.0726633	Negligible	1675.5	0.515519	ns	0.787026	ns	0.287755	Organ & Digestive traits
The_weight_of_ileum	30.7	30.13	Group1 > Group2	0.0713828	0.0713828	Negligible	1673.5	0.522982	ns	0.792584	ns	0.281514	Organ & Digestive traits
The_total_length_of_intestinal_tract	210.135	207.115	Group1 > Group2	0.075	0.075	Negligible	1333	0.526082	ns	0.792584	ns	0.278946	Organ & Digestive traits
The_relative_weight_of_omasum.body.	0.00259349	0.00254518	Group1 > Group2	0.0698287	0.0698287	Negligible	1624	0.53446	ns	0.799712	ns	0.272085	Organ & Digestive traits
Cooking_percentage	0.455319	0.461664	Group1 < Group2	-0.0710187	-0.0710187	Negligible	1295	0.537798	ns	0.799712	ns	0.269381	Meat
The_weight_of_reticulum	123.655	126.355	Group1 < Group2	-0.0659091	-0.0659091	Negligible	1438.5	0.556613	ns	0.818434	ns	0.254447	Organ & Digestive traits
X120d_Outside_the_long_tail	21.5	21.5	Equal	0.0658369	-0.0658369	Negligible	1627	0.557536	ns	0.818434	ns	0.253727	Fat deposition
The_relative_weight_of_greater_omentum_fat.body_weight.	0.0175297	0.0185191	Group1 < Group2	-0.0649351	-0.0649351	Negligible	1440	0.562489	ns	0.820446	ns	0.249886	Fat deposition
The_length_of_ileum	59	55	Group1 > Group2	0.0631229	0.0631229	Negligible	1600	0.576096	ns	0.828104	ns	0.239505	Organ & Digestive traits
FCR_120.140	4.83333	4.91571	Group1 < Group2	-0.0630266	-0.0630266	Negligible	1390	0.577948	ns	0.828104	ns	0.238112	Feed efficiency
MONOper.per.	7.2	7.6	Group1 < Group2	-0.0625614	-0.0625614	Negligible	1431	0.578588	ns	0.828104	ns	0.237631	Haematological parameters
Scrotal_circumference_120	20.5	21	Group1 < Group2	0.0609237	-0.0609237	Negligible	1619.5	0.586966	ns	0.834877	ns	0.231387	Reproduction
BASO.n..K.uL.	0.1	0.075	Group1 > Group2	0.0639746	0.0639746	Negligible	1172.5	0.598092	ns	0.845451	ns	0.223232	Haematological parameters
RDW.CV.per.	44.4	44.6	Group1 < Group2	-0.0579758	-0.0579758	Negligible	1438	0.606806	ns	0.847471	ns	0.21695	Haematological parameters
FCR_100.120	5.06377	5.00169	Group1 > Group2	0.0579758	0.0579758	Negligible	1615	0.606923	ns	0.847471	ns	0.216867	Feed efficiency
LYMPH.n..K.uL.	6.13	6.31	Group1 < Group2	-0.0569931	-0.0569931	Negligible	1439.5	0.613058	ns	0.849315	ns	0.212498	Haematological parameters
RFI_100.120	-0.02057	0.00394	Group1 < Group2	-0.0558442	-0.0558442	Negligible	1454	0.618724	ns	0.849315	ns	0.208503	Feed efficiency
The_relative_weight_of_abomasum.stomach.	0.132212	0.134549	Group1 < Group2	-0.056686	-0.056686	Negligible	1298	0.622406	ns	0.849315	ns	0.205926	Organ & Digestive traits
Scrotal_circumference_180	26	26	Equal	0.0547375	-0.0547375	Negligible	1647.5	0.623968	ns	0.849315	ns	0.204838	Reproduction
RFI_80.180	-0.009695	7.20E-04	Group1 < Group2	-0.0544174	-0.0544174	Negligible	1477	0.626787	ns	0.849315	ns	0.20288	Feed efficiency
ADFI_120.140	1.583	1.5915	Group1 < Group2	0.0538302	-0.0538302	Negligible	1527	0.637472	ns	0.854833	ns	0.195539	Feed efficiency
Thickness_of_backfat	0.3	0.3	Equal	-0.0725108	-0.0725108	Negligible	495.5	0.638325	ns	0.854833	ns	0.194958	Meat
X140d_the_tail_circumference	26	25.5	Group1 > Group2	0.0515365	0.0515365	Negligible	1642.5	0.644882	ns	0.855119	ns	0.19052	Fat deposition
RFI_80.100	0.01054	-0.01291	Group1 > Group2	0.0512164	0.0512164	Negligible	1642	0.647325	ns	0.855119	ns	0.188877	Feed efficiency
The_relative_weight_of_Total.fat.weight.body_weight.	0.0481336	0.0508687	Group1 < Group2	-0.0511628	-0.0511628	Negligible	1428	0.650985	ns	0.855119	ns	0.186429	Fat deposition
The_relative_length_of_ileum.intestinal_tract.	0.28985	0.283103	Group1 > Group2	-0.0532258	0.0532258	Negligible	1174	0.653476	ns	0.855119	ns	0.184771	Organ & Digestive traits
The_relative_weight_of_digestive_tract.body.	0.0539918	0.0526367	Group1 > Group2	0.0555839	0.0555839	Negligible	1035	0.657898	ns	0.856015	ns	0.181842	Organ & Digestive traits
The_relative_weight_of_heart	0.00411884	0.00418288	Group1 < Group2	-0.0483355	-0.0483355	Negligible	1486.5	0.66604	ns	0.860695	ns	0.1765	Organ & Digestive traits
X120d_Intratail_width	13	13	Equal	0.0478218	-0.0478218	Negligible	1599.5	0.670828	ns	0.860695	ns	0.173389	Fat deposition
Length_100	60	60	Equal	0.046735	-0.046735	Negligible	1635	0.67473	ns	0.860695	ns	0.17087	Grow traits
Meat_color_45min_b	5.4325	5.515	Group1 < Group2	-0.046735	-0.046735	Negligible	1489	0.676529	ns	0.860695	ns	0.169714	Meat
The_relative_length_of_jejunum.intestinal_tract.	0.133954	0.134104	Group1 < Group2	0.0483871	-0.0483871	Negligible	1300	0.68341	ns	0.864645	ns	0.165319	Organ & Digestive traits
The_relative_weight_of_ileum.intestinal_tract.	0.0228163	0.022626	Group1 > Group2	0.0464912	0.0464912	Negligible	1193	0.701873	ns	0.883125	ns	0.153742	Organ & Digestive traits
Hight_120	60.25	60.5	Group1 < Group2	0.0412932	-0.0412932	Negligible	1626.5	0.710868	ns	0.885899	ns	0.148211	Grow traits
Wide_ocular_muscle_area	6	6.1	Group1 < Group2	-0.0412932	-0.0412932	Negligible	1497.5	0.711814	ns	0.885899	ns	0.147633	Meat
The_pH_24h_value_of_muscle_at_24h	5.265	5.27333	Group1 < Group2	-0.0399061	-0.0399061	Negligible	1431.5	0.725917	ns	0.898568	ns	0.139113	Meat
Meat_color_24h_b	10.65	11.1317	Group1 < Group2	-0.0387324	-0.0387324	Negligible	1501.5	0.729892	ns	0.89863	ns	0.136742	Meat
Chest_80	60	60	Equal	0.0377721	-0.0377721	Negligible	1621	0.735562	ns	0.900769	ns	0.13338	Grow traits
ADFI_100.120	1.6065	1.578	Group1 > Group2	0.0350649	0.0350649	Negligible	1594	0.755495	ns	0.913103	ns	0.121769	Feed efficiency
The_relative_weight_of_duodenum.body.	8.80E-04	8.67E-04	Group1 > Group2	0.0363636	0.0363636	Negligible	1368	0.756871	ns	0.913103	ns	0.120978	Organ & Digestive traits
The_relative_weight_of_greater_omentum_fat.Carcass.	0.0329931	0.0347013	Group1 < Group2	-0.0340909	-0.0340909	Negligible	1487.5	0.76214	ns	0.913103	ns	0.117965	Fat deposition
FCR_80.180	5.98915	5.86076	Group1 > Group2	0.0339309	0.0339309	Negligible	1615	0.762568	ns	0.913103	ns	0.117721	Feed efficiency
PLT.K.uL.	625	615	Group1 > Group2	0.0337373	0.0337373	Negligible	1578	0.765571	ns	0.913103	ns	0.116014	Haematological parameters
The_weight_of_greater_omentum_fat	0.905	0.88	Group1 > Group2	0.0321429	0.0321429	Negligible	1589.5	0.775465	ns	0.9166	ns	0.110438	Fat deposition
The_weight_of_cecum	56.49	58.67	Group1 < Group2	-0.0322805	-0.0322805	Negligible	1394	0.778109	ns	0.9166	ns	0.10896	Organ & Digestive traits
The_relative_weight_of_perirenal_fat.Carcass.	0.0184615	0.0175	Group1 > Group2	0.0311169	0.0311169	Negligible	1574	0.783489	ns	0.9166	ns	0.105967	Fat deposition
ADFI_160.180	2.1525	2.125	Group1 > Group2	0.0300896	0.0300896	Negligible	1609	0.789007	ns	0.9166	ns	0.102919	Feed efficiency
Eye_muscle_are_soft	13.4955	13.194	Group1 > Group2	0.0300896	0.0300896	Negligible	1609	0.78902	ns	0.9166	ns	0.102912	Meat
Chest_140	74	74	Equal	0.0294494	-0.0294494	Negligible	1608	0.792518	ns	0.9166	ns	0.100991	Grow traits
ADG_80.100	0.286	0.285	Group1 > Group2	-0.0275288	0.0275288	Negligible	1519	0.806741	ns	0.92836	ns	0.0932661	Grow traits
Hight_180	67	67	Equal	0.0262484	-0.0262484	Negligible	1603	0.814618	ns	0.932266	ns	0.0890459	Grow traits
the_number_of_caudal_vertebra	12	12	Equal	0.024566	-0.024566	Negligible	1564	0.822346	ns	0.932266	ns	0.0849454	Organ & Digestive traits
X180d_Intratail_width	18	18	Equal	-0.024968	-0.024968	Negligible	1523	0.823843	ns	0.932266	ns	0.0841557	Fat deposition
MCV.fL.	21.2	21.3	Group1 < Group2	0.0248935	-0.0248935	Negligible	1564.5	0.826419	ns	0.932266	ns	0.0827997	Haematological parameters
Chest_100	65.5	66	Group1 < Group2	0.0236876	-0.0236876	Negligible	1599	0.83313	ns	0.935229	ns	0.0792871	Grow traits
Length_180	73	73	Equal	0.0230474	-0.0230474	Negligible	1598	0.83759	ns	0.935649	ns	0.0769685	Grow traits
The_relative_weight_of_omasum.stomach.	0.103035	0.10598	Group1 < Group2	0.0225291	-0.0225291	Negligible	1407	0.846332	ns	0.940826	ns	0.0724591	Organ & Digestive traits
the_length_of_penis.cm.	34	35	Group1 < Group2	-0.0300752	-0.0300752	Negligible	258	0.870423	ns	0.960237	ns	0.0602698	Organ & Digestive traits
PCT.per.	0.5	0.49	Group1 > Group2	0.0183426	0.0183426	Negligible	1554.5	0.87218	ns	0.960237	ns	0.0593939	Haematological parameters
Rib_number	13	13	Equal	-0.00963455	-0.00963455	Negligible	1490.5	0.888101	ns	0.964964	ns	0.0515375	Organ & Digestive traits
Meat_color_24h_a	18.9725	19.1517	Group1 < Group2	0.0153649	-0.0153649	Negligible	1586	0.89243	ns	0.964964	ns	0.0494259	Meat
The_relative_weight_of_abomasum.body.	0.00330835	0.0032793	Group1 > Group2	0.0153947	0.0153947	Negligible	1550	0.893036	ns	0.964964	ns	0.0491312	Organ & Digestive traits
The_weight_of_spleen	0.065	0.06	Group1 > Group2	-0.0150448	0.0150448	Negligible	1538.5	0.893329	ns	0.964964	ns	0.0489887	Organ & Digestive traits
X100d_Intratail_width	11.5	11.5	Equal	-0.0193906	-0.0193906	Negligible	552	0.904266	ns	0.969558	ns	0.0437037	Fat deposition
RET.n..K.uL.	5.1	4.8	Group1 > Group2	-0.0134294	0.0134294	Negligible	1506	0.906891	ns	0.969558	ns	0.042445	Haematological parameters
The_length_of_colon	7.48	7.5	Group1 < Group2	-0.0126623	-0.0126623	Negligible	1520.5	0.911903	ns	0.969558	ns	0.0400514	Organ & Digestive traits
Hight_100	57	57	Equal	-0.0121639	-0.0121639	Negligible	1543	0.914518	ns	0.969558	ns	0.0388077	Grow traits
Hight_140	63	63	Equal	0.0115237	-0.0115237	Negligible	1580	0.919311	ns	0.970149	ns	0.0365374	Grow traits
The_relative_weight_of_Total.fat.weight.Carcass.	0.0963768	0.0941423	Group1 > Group2	0.010299	0.010299	Negligible	1520.5	0.929317	ns	0.972572	ns	0.0318363	Fat deposition
MCHC.g.dL.	39.1	39.3	Group1 < Group2	-0.0101539	-0.0101539	Negligible	1511	0.930101	ns	0.972572	ns	0.0314697	Haematological parameters
MCH.pg.	8.4	8.4	Equal	0.00818867	-0.00818867	Negligible	1539	0.943899	ns	0.982513	ns	0.0250744	Haematological parameters
RBC.He.pg.	10.6	10.6	Equal	0.00556829	-0.00556829	Negligible	1535	0.962506	ns	0.987689	ns	0.0165966	Haematological parameters
RETper.per.	0.04	0.03	Group1 > Group2	0.00524075	0.00524075	Negligible	1534.5	0.96442	ns	0.987689	ns	0.0157336	Haematological parameters
Meat_color_45min_a	15.8817	16.2333	Group1 < Group2	-0.00512164	-0.00512164	Negligible	1554	0.965575	ns	0.987689	ns	0.015214	Meat
The_relative_weight_of_perirenal_fat.body_weight.	0.0091637	0.00916667	Group1 < Group2	-0.00425811	-0.00425811	Negligible	1520	0.972018	ns	0.987689	ns	0.0123257	Fat deposition
The_relative_weight_of_colon.digestive_tract.	0.159073	0.158682	Group1 > Group2	0.00458949	0.00458949	Negligible	985	0.973833	ns	0.987689	ns	0.0115155	Organ & Digestive traits
The_relative_weight_of_kidney	0.00271811	0.00266204	Group1 > Group2	0.00384123	0.00384123	Negligible	1568	0.97475	ns	0.987689	ns	0.0111067	Organ & Digestive traits
The_relative_weight_of_colon.body.	0.00866639	0.00845875	Group1 > Group2	0.00205198	0.00205198	Negligible	1465	0.987926	ns	0.99663	ns	0.00527565	Organ & Digestive traits
The_weight_of_jejunum	867.48	861.05	Group1 > Group2	6.49E-04	6.49E-04	Negligible	1541	0.997678	ns	0.997697	ns	0.00100964	Organ & Digestive traits
The_length_of_cecum	30.5	30	Group1 > Group2	6.40E-04	6.40E-04	Negligible	1563	0.997697	ns	0.997697	ns	0.00100127	Organ & Digestive traits

## Sheet: Supplementary Table S3
Supplementary Table S3. Summary of sequencing data and quality control metrics for the 16S rRNA gene amplicon sequencing.
Sample ID	Group	Total Raw Reads	Non-specific Reads	Chloroplast Reads	Mitochondrial Reads	Effective Reads (Used for Analysis)
tsp_b12_6_100	E1	64311	0	4	16	64291
tsp_b12_6_102	E1	106013	0	3	3	106007
tsp_b12_6_11	E1	68126	0	3	1	68122
tsp_b12_6_111	E1	103638	0	11	2	103625
tsp_b12_6_115	E1	105771	1	13	7	105750
tsp_b12_6_116	E1	95774	0	6	0	95768
tsp_b12_6_117	E1	93006	0	12	3	92991
tsp_b12_6_118	E1	94478	0	5	16	94457
tsp_b12_6_120	E1	91518	0	8	1	91509
tsp_b12_6_123	E1	100567	0	16	17	100534
tsp_b12_6_13	E1	58093	0	3	6	58084
tsp_b12_6_17	E1	71382	0	2	5	71375
tsp_b12_6_20	E1	89629	0	0	0	89629
tsp_b12_6_21	E1	85831	0	0	22	85809
tsp_b12_6_27	E1	86596	1	6	15	86574
tsp_b12_6_28	E1	81784	0	27	1	81756
tsp_b12_6_29	E1	68973	0	1	5	68967
tsp_b12_6_31	E1	67145	0	1	0	67144
tsp_b12_6_32	E1	79236	0	10	28	79198
tsp_b12_6_35	E1	84867	0	17	2	84848
tsp_b12_6_36	E1	75516	0	15	3	75498
tsp_b12_6_38	E1	76767	0	2	1	76764
tsp_b12_6_39	E1	77285	0	2	0	77283
tsp_b12_6_40	E1	85073	0	4	3	85066
tsp_b12_6_42	E1	67049	0	8	9	67032
tsp_b12_6_44	E1	62347	0	1	11	62335
tsp_b12_6_46	E1	68576	0	6	0	68570
tsp_b12_6_47	E1	84643	0	26	2	84615
tsp_b12_6_50	E1	70761	0	3	4	70754
tsp_b12_6_51	E1	66677	0	4	3	66670
tsp_b12_6_52	E1	68505	0	1	10	68494
tsp_b12_6_55	E1	73208	0	4	1	73203
tsp_b12_6_56	E1	80513	0	10	0	80503
tsp_b12_6_57	E1	90926	0	32	23	90871
tsp_b12_6_58	E1	105414	0	133	13	105268
tsp_b12_6_59	E1	71561	0	2	0	71559
tsp_b12_6_67	E1	71636	0	5	2	71629
tsp_b12_6_69	E1	84152	0	3	0	84149
tsp_b12_6_70	E1	89225	0	86	6	89133
tsp_b12_6_72	E1	87758	0	3	12	87743
tsp_b12_6_81	E1	89757	5	2	1	89749
tsp_b12_6_83	E1	60590	0	1	0	60589
tsp_b12_6_87	E1	49143	0	4	0	49139
tsp_b12_6_97	E1	62482	0	5	8	62469
tsp_b12_6_101	E2	80783	0	2	36	80745
tsp_b12_6_103	E2	112692	0	2	1	112689
tsp_b12_6_104	E2	128419	0	19	6	128394
tsp_b12_6_105	E2	75818	0	1	16	75801
tsp_b12_6_106	E2	105622	0	17	4	105601
tsp_b12_6_107	E2	116422	0	9	11	116402
tsp_b12_6_108	E2	103456	2	9	3	103442
tsp_b12_6_109	E2	115664	0	8	5	115651
tsp_b12_6_110	E2	102706	0	10	3	102693
tsp_b12_6_112	E2	98471	0	10	0	98461
tsp_b12_6_113	E2	81533	0	2	0	81531
tsp_b12_6_114	E2	88180	0	2	3	88175
tsp_b12_6_119	E2	101184	0	0	14	101170
tsp_b12_6_12	E2	83662	0	25	3	83634
tsp_b12_6_121	E2	115386	0	4	19	115363
tsp_b12_6_122	E2	122477	0	20	0	122457
tsp_b12_6_124	E2	143518	0	22	1	143495
tsp_b12_6_125	E2	110161	0	2	21	110138
tsp_b12_6_14	E2	78011	1	8	29	77973
tsp_b12_6_15	E2	72779	0	3	4	72772
tsp_b12_6_16	E2	104269	0	1	0	104268
tsp_b12_6_18	E2	132855	4	10	6	132835
tsp_b12_6_19	E2	67581	0	0	28	67553
tsp_b12_6_22	E2	79479	0	3	1	79475
tsp_b12_6_23	E2	74345	0	5	148	74192
tsp_b12_6_24	E2	65114	0	3	0	65111
tsp_b12_6_25	E2	62536	0	3	65	62468
tsp_b12_6_26	E2	96715	0	0	2	96713
tsp_b12_6_30	E2	69911	0	14	0	69897
tsp_b12_6_33	E2	76320	0	8	2	76310
tsp_b12_6_34	E2	76213	0	5	21	76187
tsp_b12_6_37	E2	91401	0	2	32	91367
tsp_b12_6_41	E2	70661	0	7	0	70654
tsp_b12_6_43	E2	83076	0	3	2	83071
tsp_b12_6_45	E2	72785	4	4	10	72767
tsp_b12_6_48	E2	87195	0	4	8	87183
tsp_b12_6_49	E2	83217	0	26	15	83176
tsp_b12_6_53	E2	70001	0	2	6	69993
tsp_b12_6_54	E2	92925	0	3	6	92916
tsp_b12_6_60	E2	86538	0	0	24	86514
tsp_b12_6_61	E2	71754	0	0	1	71753
tsp_b12_6_62	E2	85685	1	0	100	85584
tsp_b12_6_63	E2	72042	0	0	3	72039
tsp_b12_6_64	E2	72825	0	0	9	72816
tsp_b12_6_65	E2	67778	0	0	7	67771
tsp_b12_6_66	E2	86879	0	1	10	86868
tsp_b12_6_68	E2	71435	0	5	1	71429
tsp_b12_6_71	E2	84587	0	0	10	84577
tsp_b12_6_73	E2	99142	0	10	4	99128
tsp_b12_6_74	E2	95534	0	0	3	95531
tsp_b12_6_75	E2	87559	0	0	49	87510
tsp_b12_6_76	E2	86343	0	8	2	86333
tsp_b12_6_77	E2	83607	3	2	0	83602
tsp_b12_6_78	E2	71429	6	4	0	71419
tsp_b12_6_79	E2	78599	0	1	0	78598
tsp_b12_6_80	E2	78446	0	3	0	78443
tsp_b12_6_82	E2	90187	0	1	11	90175
tsp_b12_6_84	E2	76246	0	2	0	76244
tsp_b12_6_85	E2	71464	0	1	2	71461
tsp_b12_6_86	E2	64584	2	0	0	64582
tsp_b12_6_88	E2	80727	0	1	3	80723
tsp_b12_6_89	E2	69987	0	10	52	69925
tsp_b12_6_90	E2	84520	0	27	10	84483
tsp_b12_6_91	E2	58007	0	1	145	57861
tsp_b12_6_92	E2	62405	0	0	13	62392
tsp_b12_6_93	E2	54984	0	1	3	54980
tsp_b12_6_94	E2	68543	0	0	0	68543
tsp_b12_6_95	E2	71693	0	0	0	71693
tsp_b12_6_96	E2	83471	0	0	3	83468
tsp_b12_6_98	E2	80184	0	1	1	80182
tsp_b12_6_99	E2	72447	2	0	32	72413

## Sheet: Supplementary Table S4
Supplementary Table S4. Summary statistics of the 16S rRNA gene operational taxonomic units (OTUs) following sequence rarefaction.
Metric	Value
Total Rarefied Reads	5650985
Number of Samples	115
Total Number of OTUs/ZOTUs	6219
Rarefaction Depth (Reads per Sample)	49139
OTUs present in all samples (Core, 100%)	6 (0.1% of total)
OTUs present in ≥ 90% of samples	96 (1.5% of total)
OTUs present in ≥ 50% of samples	990 (15.9% of total)

## Sheet: Supplementary Table S5
Supplementary Table S5. Significantly differential microbial taxa (genus level) identified by the ANCOM-BC2 algorithm.
Genus	logFC	SE	pval	qval	diff_abn	passed_ss	diff_robust
Prevotella	3.7395	0.349751	8.19E-19	2.14E-16	TRUE	TRUE	TRUE
Lachnospiraceae AC2044 group	-2.34654	0.207994	9.19E-17	1.20E-14	TRUE	TRUE	TRUE
Lachnospiraceae XPB1014 group	-2.56983	0.236693	3.06E-16	2.66E-14	TRUE	TRUE	TRUE
Syntrophococcus	2.1064	0.234838	7.36E-15	3.84E-13	TRUE	TRUE	TRUE
Marvinbryantia	-2.15788	0.242309	9.20E-14	4.00E-12	TRUE	TRUE	TRUE
Christensenellaceae R-7 group	-1.52194	0.184091	2.97E-13	1.11E-11	TRUE	TRUE	TRUE
Prevotellaceae UCG-003	-2.34225	0.304895	7.57E-12	2.47E-10	TRUE	TRUE	TRUE
Acidaminococcus	2.35586	0.305456	2.01E-11	5.24E-10	TRUE	TRUE	TRUE
Lachnospira	1.7755	0.233948	2.84E-11	6.74E-10	TRUE	TRUE	TRUE
Erysipelotrichaceae UCG-002	3.07758	0.398169	3.14E-11	6.83E-10	TRUE	TRUE	TRUE
Hoylesella	2.25107	0.309102	7.34E-11	1.47E-09	TRUE	TRUE	TRUE
Blautia	-1.52319	0.204234	1.19E-10	2.22E-09	TRUE	TRUE	TRUE
Erysipelotrichaceae UCG-006	1.74656	0.24455	1.70E-10	2.61E-09	TRUE	TRUE	TRUE
probable genus 10	-2.2572	0.313429	1.66E-10	2.61E-09	TRUE	TRUE	TRUE
Dialister	3.22456	0.446037	1.61E-10	2.61E-09	TRUE	TRUE	TRUE
Shuttleworthia	2.41817	0.352231	3.89E-10	5.64E-09	TRUE	TRUE	TRUE
Acutalibacter	-1.54163	0.216495	5.85E-10	7.27E-09	TRUE	TRUE	TRUE
Prevotellaceae Ga6A1 group	-2.2778	0.340427	1.18E-09	1.40E-08	TRUE	TRUE	TRUE
Lachnospiraceae ND3007 group	-1.39772	0.219949	4.54E-09	5.15E-08	TRUE	TRUE	TRUE
Rikenellaceae RC9 gut group	-0.958021	0.153174	7.32E-09	7.96E-08	TRUE	TRUE	TRUE
Erysipelotrichaceae UCG-007	2.00784	0.281193	8.06E-09	8.42E-08	TRUE	TRUE	TRUE
Veillonellaceae UCG-001	-2.16284	0.34627	1.06E-08	1.06E-07	TRUE	TRUE	TRUE
Succinivibrionaceae UCG-001	2.49937	0.400619	1.22E-08	1.14E-07	TRUE	TRUE	TRUE
Treponema	-1.27327	0.210057	1.82E-08	1.64E-07	TRUE	TRUE	TRUE
Sharpea	2.43381	0.398138	1.99E-08	1.73E-07	TRUE	TRUE	TRUE
Lachnospiraceae NK3A20 group	1.12008	0.192951	6.00E-08	5.05E-07	TRUE	TRUE	TRUE
UCG-002	-1.61732	0.28447	1.05E-07	7.85E-07	TRUE	TRUE	TRUE
Butyrivibrio	-1.10115	0.19938	2.16E-07	1.56E-06	TRUE	TRUE	TRUE
Anaerovibrio	-1.70128	0.306922	2.34E-07	1.65E-06	TRUE	TRUE	TRUE
Anaeroplasma	-1.30808	0.232335	3.59E-07	2.40E-06	TRUE	TRUE	TRUE
Sphaerochaeta	1.19409	0.220732	3.57E-07	2.40E-06	TRUE	TRUE	TRUE
Defluviitaleaceae UCG-011	-1.15086	0.2144	4.36E-07	2.84E-06	TRUE	TRUE	TRUE
Olsenella	1.50474	0.286539	7.17E-07	4.56E-06	TRUE	TRUE	TRUE
Megasphaera	1.89235	0.350015	7.74E-07	4.79E-06	TRUE	TRUE	TRUE
Saccharofermentans	-1.65928	0.325303	1.38E-06	8.16E-06	TRUE	TRUE	TRUE
Pseudobutyrivibrio	-1.42222	0.278212	1.46E-06	8.45E-06	TRUE	TRUE	TRUE
Paraprevotella	-1.32114	0.258868	1.84E-06	1.05E-05	TRUE	TRUE	TRUE
Anaerovorax	-1.21483	0.242238	2.12E-06	1.18E-05	TRUE	TRUE	TRUE
Solobacterium	1.268	0.258466	3.15E-06	1.71E-05	TRUE	TRUE	TRUE
Asteroleplasma	1.30315	0.268503	3.92E-06	2.09E-05	TRUE	TRUE	TRUE
Lachnospiraceae UCG-006	-0.832028	0.176556	7.14E-06	3.52E-05	TRUE	TRUE	TRUE
Lachnospiraceae NK4A136 group	-1.4279	0.308607	1.00E-05	4.68E-05	TRUE	TRUE	TRUE
Prevotellaceae UCG-001	-0.875101	0.189552	1.04E-05	4.75E-05	TRUE	TRUE	TRUE
Mitsuokella	1.34274	0.285217	1.12E-05	5.05E-05	TRUE	TRUE	TRUE
[Eubacterium] eligens group	1.2873	0.264922	1.30E-05	5.75E-05	TRUE	TRUE	TRUE
Quinella	-1.29081	0.248429	1.47E-05	6.40E-05	TRUE	TRUE	TRUE
Lachnospiraceae FCS020 group	-0.926487	0.205883	2.52E-05	0.000102566	TRUE	TRUE	TRUE
Anaerobutyricum	-0.873045	0.205314	4.99E-05	0.000194455	TRUE	TRUE	TRUE
Oribacterium	0.849317	0.202154	5.32E-05	0.000204288	TRUE	TRUE	TRUE
Erysipelotrichaceae UCG-009	1.07414	0.26018	7.02E-05	0.000265512	TRUE	TRUE	TRUE
Anaerofustis	-0.668982	0.157527	9.19E-05	0.000337958	TRUE	TRUE	TRUE
Segatella	1.04107	0.259225	0.000106892	0.000387482	TRUE	TRUE	TRUE
Catenisphaera	0.947312	0.233459	0.000124251	0.000444239	TRUE	TRUE	TRUE
Berryella	-0.827658	0.211806	0.000159233	0.00054684	TRUE	TRUE	TRUE
Tractidigestivibacter	1.31967	0.339045	0.00017467	0.000592062	TRUE	TRUE	TRUE
Adlercreutzia	-0.74059	0.19749	0.00030081	0.000945921	TRUE	TRUE	TRUE
NK4A214 group	-0.666411	0.193214	0.000791441	0.00232097	TRUE	TRUE	TRUE
Xylanibacter	-0.547433	0.164226	0.00116048	0.00332842	TRUE	TRUE	TRUE
Coriobacteriaceae UCG-002	1.12348	0.338692	0.00128543	0.0036075	TRUE	TRUE	TRUE
Allisonella	0.864486	0.254593	0.00133389	0.00370368	TRUE	TRUE	TRUE
Moryella	-0.683877	0.21458	0.00185905	0.00500219	TRUE	TRUE	TRUE
Colidextribacter	-0.552059	0.183408	0.00369788	0.00937035	TRUE	TRUE	TRUE
Candidatus Saccharimonas	-0.603808	0.203593	0.00368465	0.00937035	TRUE	TRUE	TRUE
Fibrobacter	-1.08105	0.368043	0.00401343	0.0100722	TRUE	TRUE	TRUE
Lachnospiraceae UCG-008	-0.704772	0.246158	0.00500154	0.0122	TRUE	TRUE	TRUE
Sutterella	0.548951	0.213259	0.0127736	0.0264596	TRUE	TRUE	TRUE
[Clostridium] methylpentosum group	-0.805512	0.33639	0.0187863	0.0383064	TRUE	TRUE	TRUE
Lachnoclostridium	-0.721106	0.302047	0.0192974	0.0390436	TRUE	TRUE	TRUE
Papillibacter	-0.500116	0.211746	0.0204414	0.0410401	TRUE	TRUE	TRUE
Schwartzia	-0.572072	0.251603	0.0249243	0.0489117	TRUE	TRUE	TRUE

## Sheet: Supplementary Table S6
Supplementary Table S6. Significantly differential microbial taxa (genus level) identified by the ALDEx2 algorithm.
Genus	we_p	we_q	wi_p	wi_q	effect	diff_btw	diff_win	rab_all	overlap
Prevotella	7.92398830172678e-20	1.16234667079947e-17	2.33867378500054e-17	6.78215397650159e-15	-1.45975	-5.14709	3.38142	8.7609	0.029819
Syntrophococcus	5.83863809258767e-20	8.68496736536154e-18	1.57701916426552e-14	2.28667778818501e-12	-1.38263	-3.23961	2.163	6.61724	0.0709975
Christensenellaceae R-7 group	0	0	1.2267964422108e-14	3.53305926181768e-12	1.42999	2.16332	1.42329	7.03597	0.0667377
Rikenellaceae RC9 gut group	2.65065747129256e-15	3.62629486623985e-13	4.259977787191e-13	3.2795967619866e-11	1.18972	1.31591	1.02986	9.90019	0.0944602
Acidaminococcus	4.95200305847979e-11	1.12941859676049e-09	9.71779093978676e-13	6.50442868271251e-11	-1.11807	-5.17626	4.38721	1.32152	0.104048
Lachnospira	4.69388112207122e-10	6.99617760087923e-09	1.09636100693843e-12	7.05183884183343e-11	-0.939951	-3.7644	3.82263	2.3393	0.101563
Hoylesella	4.94677198454304e-13	1.72885960231853e-11	1.40059195330072e-12	8.47079351274154e-11	-1.01366	-3.91085	3.7649	3.2209	0.10973
Prevotellaceae UCG-003	1.96706590772922e-09	3.59453295234813e-08	1.68088980234682e-12	9.62418825189992e-11	1.03837	3.69974	3.2904	4.63393	0.110085
Lachnospiraceae NK3A20 group	1.65124769201835e-12	6.67381723495505e-11	3.096070804619e-12	1.53902226197274e-10	-1.06282	-1.68872	1.47861	8.51379	0.111111
Erysipelotrichaceae UCG-006	7.31794572103325e-08	7.01029676920721e-07	2.5734387371079e-11	1.0087010490668e-09	-0.840247	-3.21063	3.52736	3.62494	0.125355
Treponema	5.24282683239674e-11	2.10200525148892e-09	3.10914644724436e-11	1.12983310110531e-09	1.0096	1.68063	1.61485	8.76892	0.12642
Marvinbryantia	1.86478023821157e-09	3.70926486953817e-08	9.83423047856702e-11	2.54793103193574e-09	0.955329	4.48083	4.29491	0.581033	0.132813
Erysipelotrichaceae UCG-002	2.59165945594928e-10	3.95075804212638e-09	8.21137729218068e-11	2.66321698331117e-09	-1.06391	-7.25444	6.03975	1.61445	0.13241
Veillonellaceae UCG-001	2.47695824406868e-08	3.72948669339018e-07	9.11594688624007e-11	2.74217264210103e-09	0.867967	4.68655	5.02158	5.60146	0.138139
Shuttleworthia	2.49913064217269e-12	9.61676540248771e-11	1.49728124861854e-10	4.72398795872761e-09	-0.935832	-3.73728	3.66418	5.0117	0.145241
Lachnospiraceae ND3007 group	9.99237498300332e-12	5.49089239450857e-10	2.02105268284902e-10	5.22723211009493e-09	0.953179	1.92539	1.92279	5.80322	0.142045
Prevotellaceae Ga6A1 group	2.21539792882169e-08	3.27197878881429e-07	2.24555237252066e-10	5.74609807525496e-09	0.913049	4.1716	4.22313	4.08554	0.145241
Sphaerochaeta	1.6670190707044e-10	4.04410153998787e-09	3.1901208029874e-10	8.88314844248257e-09	-0.92641	-1.82925	1.86824	4.87076	0.149095
Lachnospiraceae AC2044 group	1.23003005584807e-07	1.1787387132544e-06	9.06799014349646e-10	1.48835700522858e-08	1.00683	5.0949	4.62637	-0.53495	0.1388
Defluviitaleaceae UCG-011	1.76837945426757e-06	1.44825856990902e-05	1.52733304822905e-09	2.77646323858622e-08	0.820717	1.60754	1.77765	4.39525	0.159389
Megasphaera	9.70248974372102e-10	1.67131549293888e-08	1.28900694389738e-09	2.93798617514432e-08	-0.953705	-5.47775	5.34157	-0.194232	0.158679
Butyrivibrio	1.04034174504275e-09	2.72880037494207e-08	1.64373701629084e-09	2.98660607768563e-08	0.9195	1.53291	1.52637	5.57641	0.154065
Anaerovorax	2.67034221567864e-05	0.000187799	2.4297508692539e-09	4.07727448311812e-08	0.698816	1.98545	2.47503	3.53888	0.170455
UCG-001	1.94806130147246e-07	2.22984946696448e-06	3.23435353499768e-09	5.20652491548466e-08	0.81553	4.31038	4.91758	2.18916	0.164004
Sharpea	3.65621092518782e-09	5.75082335345843e-08	3.72328330499634e-09	7.62244788765904e-08	-0.827449	-4.63324	5.33225	2.90011	0.166903
Succinivibrionaceae UCG-001	1.47892735204236e-07	1.44010874022943e-06	4.00472426949752e-09	7.82069295663372e-08	-0.819299	-4.65989	5.20373	2.1463	0.17152
Dialister	3.28284592235291e-07	3.18635826636926e-06	4.17171076721933e-09	8.06498013368858e-08	-0.853468	-6.24693	7.08516	3.82429	0.176429
Pseudobutyrivibrio	8.52106137417402e-07	8.62022995630672e-06	8.57008155066841e-09	1.21321469887026e-07	0.719959	2.71241	3.5375	3.6366	0.176074
UCG-002	5.91135689922279e-07	5.55916344805759e-06	1.11660959731946e-08	1.52747317983208e-07	0.79465	2.3668	2.72581	4.30832	0.175719
Lachnospiraceae XPB1014 group	2.00301437571632e-08	2.70683161274182e-07	1.22584432014905e-08	1.53070956521521e-07	0.881808	5.39728	5.40161	-0.13237	0.173234
Anaerovibrio	2.17408318836133e-06	2.02475424283732e-05	1.45092410638176e-08	1.93286237281315e-07	0.695817	3.1551	4.00498	3.62267	0.183594
[Eubacterium] eligens group	1.67232492326384e-06	1.43405543159925e-05	2.46178142808636e-08	3.23259766168818e-07	-0.865404	-5.03181	5.28025	-2.04822	0.177202
Asteroleplasma	5.38715354013954e-07	5.36952861169317e-06	2.28416688495606e-08	3.32261770804185e-07	-0.717783	-1.82198	2.33825	3.48548	0.176491
Blautia	3.09736877206201e-06	2.60113347998953e-05	4.26338890788247e-08	4.71661506989432e-07	0.735265	3.35458	4.13308	-0.145939	0.182173
Solobacterium	4.77437639628297e-08	6.45872614132859e-07	3.9486253818654e-08	5.38890898384786e-07	-0.735645	-1.96978	2.4375	2.76528	0.192827
Prevotellaceae UCG-001	5.3540328970661e-08	8.37865620457034e-07	4.6339333077336e-08	5.39953185289558e-07	0.760174	1.13583	1.39155	9.7334	0.196378
Saccharofermentans	3.55389347865206e-07	4.44098914110686e-06	8.72292646551809e-08	9.5706777914146e-07	0.738679	2.21285	2.69199	7.79653	0.20206
Olsenella	1.91598638974201e-08	2.94666762110347e-07	8.02025137925722e-08	1.01192371093821e-06	-0.69126	-1.93473	2.58438	5.20152	0.197443
Allisonella	4.59341932847652e-06	3.79208996280269e-05	8.6660098001354e-08	1.02627870489695e-06	-0.765966	-3.84687	4.56565	-1.894	0.184594
Oribacterium	2.34613825313751e-08	3.47524082526934e-07	1.25204014039944e-07	1.50254105742702e-06	-0.764376	-1.37031	1.66447	6.06584	0.198153
Erysipelotrichaceae UCG-007	6.07662611478333e-06	4.91711331237273e-05	3.31213199348792e-07	3.50472443288864e-06	-0.744908	-4.79999	5.79073	-2.25213	0.191693
Acutalibacter	2.00358356212699e-05	0.000148991	8.96799792888398e-07	7.60270300876862e-06	0.650359	3.26131	4.62653	-0.116936	0.220881
Lachnospiraceae NK4A136 group	3.48680697960339e-06	3.23902759551889e-05	1.24982276999627e-06	1.06778525255354e-05	0.645148	2.18974	3.04543	3.51493	0.228693
Lachnospiraceae UCG-006	0.000293018	0.00153671	1.59393217993159e-06	1.22526433658751e-05	0.61018	1.09956	1.53884	1.90848	0.214767
Mitsuokella	4.18221906049458e-05	0.000302048	1.53526604617509e-06	1.59033575865525e-05	-0.626282	-3.60956	5.26485	0.783215	0.222932
Xylanibacter	2.02546513518257e-05	0.000162068	3.34642671755668e-06	2.57511447699987e-05	0.556654	0.597812	0.972338	12.6375	0.237132
Adlercreutzia	0.000107593	0.000681504	3.65420484613362e-06	2.66850649760668e-05	0.540326	1.7941	2.85204	0.814489	0.231889
Erysipelotrichaceae UCG-009	2.87525171851057e-06	2.78730286321816e-05	3.83287389990105e-06	3.83021687669976e-05	-0.618796	-1.57527	2.33183	3.45997	0.239347
Lachnospiraceae FCS020 group	8.51802821950388e-05	0.00049792	5.86038687812838e-06	3.83296846124008e-05	0.643269	2.81205	3.9912	-0.868419	0.216897
Anaerobutyricum	0.000238171	0.00132257	5.96540729990401e-06	4.22906938779749e-05	0.548138	1.96949	3.1733	0.267753	0.23473
Berryella	4.02560065734386e-05	0.000296275	6.61418179783921e-06	4.8151759876723e-05	0.579656	1.07122	1.64536	4.39166	0.250266
Paraprevotella	0.000144811	0.000921573	9.0670706104825e-06	6.34901236891044e-05	0.586362	2.7829	4.27405	0.745276	0.236777
Segatella	1.8632948234135e-06	1.88412717421007e-05	8.13409415663918e-06	7.81583163195723e-05	-0.598172	-1.51835	2.43876	7.76617	0.252041
NK4A214 group	2.62953625199611e-05	0.000204892	1.67320968500004e-05	0.00011467	0.603164	0.905181	1.4441	6.80072	0.259943
Tractidigestivibacter	1.38417279825339e-06	1.43047429120089e-05	1.54391657697114e-05	0.000139521	-0.536751	-2.30687	4.03202	2.93529	0.261719
Coriobacteriaceae UCG-002	8.31469630532445e-06	7.2903744788737e-05	1.66657035345737e-05	0.000148483	-0.547623	-2.75911	4.61424	2.21951	0.262691
[Ruminococcus] gauvreauii group	3.83831765876179e-05	0.000324923	3.42622416445312e-05	0.000289915	-0.542745	-1.1581	1.90516	6.35675	0.254526
Unassigned	0.000411475	0.00256764	4.52182636817636e-05	0.000291467	0.511495	0.884581	1.45247	8.67852	0.267401
Anaerofustis	0.00288028	0.0110651	0.000117109	0.000640695	0.515332	2.5017	4.13667	-1.96314	0.241477
Desulfovibrio	9.62216230114059e-05	0.000754569	0.000156471	0.00118151	-0.507679	-1.2433	2.27383	4.2007	0.29109
Anaeroplasma	0.00199855	0.00846772	0.000263563	0.00146408	0.468065	2.58304	4.79776	-0.72553	0.276278
Moryella	0.000353424	0.00220544	0.000386278	0.00223276	0.466245	0.890045	1.72801	4.2098	0.29581
Erysipelotrichaceae UCG-008	0.00653515	0.0256716	0.000456542	0.00236671	0.425408	1.85676	3.78536	-1.30101	0.292865
Acetitomaculum	0.00023084	0.00170342	0.000339623	0.00243902	-0.471225	-0.964178	1.99254	5.421	0.303267
Lachnospiraceae UCG-008	0.00165126	0.00894533	0.000617604	0.00346155	0.367953	0.80698	1.86199	4.72364	0.302804
Catenisphaera	0.00564072	0.0297931	0.000602939	0.00392403	-0.398024	-2.01647	4.32153	-1.01034	0.29393
Candidatus Saccharimonas	0.000529835	0.00320785	0.00106897	0.00578364	0.426251	0.763515	1.71204	6.65507	0.320199
Sutterella	0.0100107	0.0448251	0.00174297	0.00963335	-0.419715	-2.08005	4.39073	-1.84375	0.29794
[Eubacterium] ventriosum group	0.0155368	0.0762033	0.0018462	0.0112901	-0.384892	-1.33697	3.06507	1.0292	0.318424
Family XIII AD3011 group	0.00176493	0.00941361	0.00258681	0.0127414	0.371611	0.54436	1.34109	4.90042	0.334753
Schwartzia	0.00582689	0.0273531	0.00277054	0.0136516	0.240905	0.724717	2.11768	4.91689	0.335463
Prevotellaceae UCG-004	0.00212215	0.0111713	0.00375781	0.0180128	0.369653	0.650276	1.62914	5.13535	0.339489
Campylobacter	0.0284616	0.114097	0.00397562	0.0202723	-0.332564	-1.46017	3.72516	-1.34983	0.307173
Pseudoramibacter	0.00740303	0.0356055	0.00356804	0.0203036	-0.317362	-1.12392	2.9654	1.02452	0.332031
Aminicella	0.00432898	0.0254849	0.00541268	0.0297149	-0.383516	-0.665293	1.65329	2.53693	0.332978
Hornefia	0.0644122	0.244065	0.00583828	0.0323442	-0.320183	-0.911372	2.48652	1.91492	0.336293
Bacteroides	0.00369381	0.0200932	0.00599301	0.0323749	-0.296671	-0.972577	2.88539	0.188647	0.343395
[Clostridium] methylpentosum group	0.0122431	0.0516736	0.00788216	0.035093	0.325097	2.13119	5.98069	2.09815	0.346946
Lachnoclostridium	0.0245145	0.089979	0.0113987	0.0474617	0.322144	1.7579	5.15492	-0.155824	0.351793
Atopobium	0.0111044	0.0470445	0.0118708	0.0495504	0.281949	0.894323	2.7769	1.39247	0.354759

## Sheet: Supplementary Table S7
Supplementary Table S7. Summary of raw sequencing data and quality control for the rumen metagenome (n = 15).
file	format	type	num_seqs	sum_len	min_len	avg_len	max_len
seq/tsp_b12_6_11_R1.fq.gz	FASTQ	DNA	34302599	5179692449	151	151	151
seq/tsp_b12_6_11_R2.fq.gz	FASTQ	DNA	34302599	5179692449	151	151	151
seq/tsp_b12_6_12_R1.fq.gz	FASTQ	DNA	38131333	5757831283	151	151	151
seq/tsp_b12_6_12_R2.fq.gz	FASTQ	DNA	38131333	5757831283	151	151	151
seq/tsp_b12_6_13_R1.fq.gz	FASTQ	DNA	42023753	6345586703	151	151	151
seq/tsp_b12_6_13_R2.fq.gz	FASTQ	DNA	42023753	6345586703	151	151	151
seq/tsp_b12_6_14_R1.fq.gz	FASTQ	DNA	34974832	5281199632	151	151	151
seq/tsp_b12_6_14_R2.fq.gz	FASTQ	DNA	34974832	5281199632	151	151	151
seq/tsp_b12_6_15_R1.fq.gz	FASTQ	DNA	31400916	4741538316	151	151	151
seq/tsp_b12_6_15_R2.fq.gz	FASTQ	DNA	31400916	4741538316	151	151	151
seq/tsp_b12_6_16_R1.fq.gz	FASTQ	DNA	41570769	6277186119	151	151	151
seq/tsp_b12_6_16_R2.fq.gz	FASTQ	DNA	41570769	6277186119	151	151	151
seq/tsp_b12_6_17_R1.fq.gz	FASTQ	DNA	38905858	5874784558	151	151	151
seq/tsp_b12_6_17_R2.fq.gz	FASTQ	DNA	38905858	5874784558	151	151	151
seq/tsp_b12_6_18_R1.fq.gz	FASTQ	DNA	35133916	5305221316	151	151	151
seq/tsp_b12_6_18_R2.fq.gz	FASTQ	DNA	35133916	5305221316	151	151	151
seq/tsp_b12_6_19_R1.fq.gz	FASTQ	DNA	39651875	5987433125	151	151	151
seq/tsp_b12_6_19_R2.fq.gz	FASTQ	DNA	39651875	5987433125	151	151	151
seq/tsp_b12_6_20_R1.fq.gz	FASTQ	DNA	43308305	6539554055	151	151	151
seq/tsp_b12_6_20_R2.fq.gz	FASTQ	DNA	43308305	6539554055	151	151	151
seq/tsp_b12_6_21_R1.fq.gz	FASTQ	DNA	32770034	4948275134	151	151	151
seq/tsp_b12_6_21_R2.fq.gz	FASTQ	DNA	32770034	4948275134	151	151	151
seq/tsp_b12_6_22_R1.fq.gz	FASTQ	DNA	43043592	6499582392	151	151	151
seq/tsp_b12_6_22_R2.fq.gz	FASTQ	DNA	43043592	6499582392	151	151	151
seq/tsp_b12_6_23_R1.fq.gz	FASTQ	DNA	42285308	6385081508	151	151	151
seq/tsp_b12_6_23_R2.fq.gz	FASTQ	DNA	42285308	6385081508	151	151	151
seq/tsp_b12_6_25_R1.fq.gz	FASTQ	DNA	38518983	5816366433	151	151	151
seq/tsp_b12_6_25_R2.fq.gz	FASTQ	DNA	38518983	5816366433	151	151	151
seq/tsp_b12_6_26_R1.fq.gz	FASTQ	DNA	32675811	4934047461	151	151	151
seq/tsp_b12_6_26_R2.fq.gz	FASTQ	DNA	32675811	4934047461	151	151	151

## Sheet: Supplementary Table S8
Supplementary Table S8. Summary of MEGAHIT cross-assembly statistics for the rumen metagenome corresponding to the E1 and E2 enterotypes.
Assembly Metric	E1 Enterotype	E2 Enterotype
Total Number of Contigs	1557364	3805383
Total Assembled Length (bp)	1660294368	3493844914
Average Contig Length (bp)	1066.1	918.1
Maximum Contig Length (bp)	578389	526550

## Sheet: Supplementary Table S9
Supplementary Table S9. Significantly differential carbohydrate-active enzyme (CAZyme) families between the two enterotypes.
CAZy	p	Significance	estimate	conf.low	conf.high	Mean_RA
GH149	0.00586	**	-0.00945385	-0.0178538	-0.00258838	0.0145644
CBM51	0.012	*	-0.059777	-0.142048	-0.0181223	0.125038
GH147	0.012	*	-0.000835	-0.0013598	-0.000311	9.52E-04
GH37	0.012	*	-0.018555	-0.0638194	-0.00219539	0.0819352
GT71	0.012	*	-0.0297369	-0.0806503	-0.00686187	0.0439746
CBM13	0.0169	*	-0.0889474	-0.186721	-0.0187853	1.08394
CE12	0.0169	*	0.0842011	0.0264307	0.173935	0.404733
GH116	0.0169	*	-0.0114545	-0.021491	-0.00220956	0.0173096
GH148	0.0169	*	-0.00390627	-0.0109973	-0.000126	0.00833863
GH28	0.0169	*	0.249708	0.105604	0.480974	1.55864
GH30	0.0169	*	-0.0701273	-0.185824	-0.00612541	0.200235
GH36	0.0169	*	-0.745785	-2.74359	-0.10101	1.42356
GT35	0.0169	*	-0.0407605	-0.0853862	-0.020126	0.714137
CBM21	0.0235	*	-0.0425346	-0.141498	-0.00393194	0.0650835
CBM43	0.0235	*	-0.0675036	-0.206732	-0.00386031	0.524519
GH163	0.0235	*	-0.00855713	-0.0238122	-0.00241713	0.0235271
GH170	0.0235	*	0.0643537	0.011518	0.0966338	0.166481
GH35	0.0235	*	0.351528	0.14269	0.826736	0.967772
GH85	0.0235	*	-0.0156164	-0.0384914	0.00116253	0.0506674
GT22	0.0235	*	-0.0829449	-0.397372	-0.0131008	0.26908
GT23	0.0235	*	-0.0634889	-0.245406	-0.00509069	0.112185
GT59	0.0235	*	-0.00864725	-0.0236721	-0.000351	0.0107011
GT75	0.0235	*	-0.000534	-0.00162957	-3.52e-05	8.22E-04
PL35	0.0235	*	-0.00495109	-0.0115935	-0.000332	0.0119866
PL16	0.0319	*	-0.000735	-0.00126029	1.05E-04	7.90E-04
AA4	0.0321	*	-0.016822	-0.0520972	-0.00319345	0.0331848
CBM53	0.0321	*	-0.000283	-0.00366072	-4.22e-05	0.00162959
CBM62	0.0321	*	-0.0260633	-0.0407138	0.00691106	0.0842002
CE13	0.0321	*	-0.0467492	-0.137766	0.00176161	0.0648827
CE15	0.0321	*	0.0119941	-0.00573851	0.0606435	0.128908
GH17	0.0321	*	-0.0481525	-0.255211	0.00994025	0.467127
GH22	0.0321	*	-0.0125732	-0.0421494	-0.00045	0.0194392
GH72	0.0321	*	-0.0314091	-0.0596769	8.41E-04	0.202978
GT1	0.0321	*	-0.261661	-0.698074	-0.00163528	1.12112
GT112	0.0321	*	-0.0021393	-0.0124385	-1.36e-05	0.00717091
GT91	0.0321	*	-0.00411986	-0.0116916	-0.000588	0.00583365
PL8	0.0321	*	0.0880824	0.00673814	0.210417	0.186465
AA8	0.0426	*	-0.000484	-0.00150567	2.28E-04	5.30E-04
AA1	0.0433	*	-0.195481	-0.656695	0.00140234	0.353483
AA10	0.0433	*	-0.0993205	-0.27137	0.0130341	0.138481
CBM45	0.0433	*	-0.00654962	-0.0237032	-0.000168	0.0156307
CBM48	0.0433	*	-0.059017	-0.233728	-0.00890895	1.15746
CBM91	0.0433	*	0.0779305	0.00800062	0.238284	0.217149
GH105	0.0433	*	0.0695939	0.00528567	0.176337	0.359534
GH117	0.0433	*	0.0150817	0.00464262	0.0494359	0.12563
GH133	0.0433	*	0.039496	0.00546892	0.0815148	0.252817
GH143	0.0433	*	0.012477	1.96E-04	0.0348397	0.0152004
GH152	0.0433	*	-0.064953	-0.161772	0.0198414	0.276822
GH154	0.0433	*	-0.0497134	-0.16441	-0.0053347	0.20024
GH18	0.0433	*	-0.151796	-0.487865	-0.0122499	0.614875
GH19	0.0433	*	0.0593904	0.00124361	0.15937	0.144581
GH2	0.0433	*	0.47051	0.0640289	0.863476	1.77593
GH55	0.0433	*	0.0516493	0.011064	0.140084	0.244776
GH67	0.0433	*	0.0574123	0.00758251	0.0972071	0.131359
GH79	0.0433	*	-0.015394	-0.0617879	0.00144027	0.0279974
GH89	0.0433	*	0.0557534	0.00423678	0.104159	0.194622
GH95	0.0433	*	0.0467356	-0.0361145	0.109573	0.334026
GT101	0.0433	*	-0.00508799	-0.0114102	6.53E-04	0.0108767
GT31	0.0433	*	-0.0456546	-0.177614	0.00415122	0.215961
GT50	0.0433	*	-0.0509237	-0.137467	0.00995128	0.075855
GT57	0.0433	*	-0.0247052	-0.0582868	-0.000143	0.0594726
GT64	0.0433	*	-0.0297806	-0.0999125	8.43E-04	0.0785772
GT90	0.0433	*	-0.0280851	-0.0471014	-0.00680107	0.153124

## Sheet: Supplementary Table S10
Supplementary Table S10. Significantly differential Kyoto Encyclopedia of Genes and Genomes (KEGG) metabolic pathways in the rumen metagenome.
Pathway	p	Significance	estimate	conf.low	conf.high	Mean_Abundance
D-Alanine metabolism	0.012	*	2.469440388941351e-4	2.6197238729924982e-5	5.22903742381207e-4	7.916081935906794e-4
Peroxisome	0.012	*	3.316112645205902e-4	5.550937003426687e-5	7.000768855182315e-4	0.00142184
Lipoarabinomannan (LAM) biosynthesis	0.0169	*	7.159545227691149e-5	1.4152353386890005e-5	1.0904137479649484e-4	1.271422111647145e-4
Amino sugar and nucleotide sugar metabolism	0.0235	*	0.00197755	1.1646215451159916e-4	0.00483641	0.00951422
Biosynthesis of various secondary metabolites - part 2	0.0235	*	5.048036724439552e-4	0.000160053	0.00108311	0.00142091
Phenazine biosynthesis	0.0235	*	1.5120927425071992e-4	1.412881974100004e-5	2.7906075502737995e-4	3.988529375334167e-4
Porphyrin and chlorophyll metabolism	0.0235	*	0.00119044	7.393056427956995e-5	0.00228152	0.00376545
Pyrimidine metabolism	0.0235	*	0.00211545	8.660534109868057e-5	0.00445491	0.00930813
Streptomycin biosynthesis	0.0235	*	5.671406769893949e-4	6.149539995023e-5	0.00122108	0.00252922
Ubiquinone and other terpenoid-quinone biosynthesis	0.0235	*	6.806844216093201e-4	-6.56751e-06	0.00104861	0.00130454
Vancomycin resistance	0.0235	*	5.114951958464704e-4	-3.64281e-05	0.00118537	0.00205475
beta-Alanine metabolism	0.0235	*	1.5996131785560492e-4	6.631592469230033e-6	4.2186343382586496e-4	8.191139251617546e-4
beta-Lactam resistance	0.0235	*	8.2445239582185e-4	-2.92096e-05	0.00158325	0.00276784
Ascorbate and aldarate metabolism	0.0321	*	1.3683396312625024e-4	-1.0747e-05	4.5719868658913e-4	0.00105194
Biosynthesis of unsaturated fatty acids	0.0321	*	-3.27206e-05	-5.51622e-05	2.276250420812345e-6	6.7760376953852e-5
Galactose metabolism	0.0321	*	0.00164433	-7.965e-05	0.0031879	0.00608253
Nicotinate and nicotinamide metabolism	0.0321	*	9.14644299628095e-4	5.157007124236567e-5	0.00184167	0.00391807
Pentose and glucuronate interconversions	0.0321	*	0.00130461	1.9239649576600036e-4	0.0020387	0.00360357
RNA transport	0.0321	*	-0.000554991	-0.00107927	4.90698903756418e-5	0.00136027
Tyrosine metabolism	0.0321	*	1.3626949141084003e-4	2.5158682911389932e-5	3.5638778657916606e-4	9.514659881738007e-4
Acarbose and validamycin biosynthesis	0.0433	*	2.2221370714711514e-4	4.563639239188534e-5	4.935096604788301e-4	8.780028769102527e-4
Cationic antimicrobial peptide (CAMP) resistance	0.0433	*	7.351092233587649e-4	1.2681456082193994e-4	0.0012766	0.00199683
Fat digestion and absorption	0.0433	*	-3.02294e-05	-4.13348e-05	-4.34699e-06	7.495872413670955e-5
Fatty acid biosynthesis	0.0433	*	0.00113054	1.79252835445903e-4	0.0025098	0.004416
Lipoic acid metabolism	0.0433	*	8.965833693135501e-5	-1.18888e-06	1.232255138621252e-4	1.4542615906390938e-4
Lysine biosynthesis	0.0433	*	8.465061623986695e-4	-0.000150999	0.00185772	0.00341858
O-Antigen nucleotide sugar biosynthesis	0.0433	*	0.00143077	1.1567324573494673e-4	0.00313302	0.00578461
Polyketide sugar unit biosynthesis	0.0433	*	3.9425908980237506e-4	3.739458680841485e-5	8.583784647547149e-4	0.00154498
Prodigiosin biosynthesis	0.0433	*	2.3469091682574495e-4	-2.58208e-05	4.7441359996794e-4	7.364362320480207e-4
Proteasome	0.0433	*	-0.000167582	-0.000422138	1.117039641096497e-5	2.451929484462026e-4
Riboflavin metabolism	0.0433	*	4.29909399512905e-4	1.2925611973258985e-4	8.331598379545402e-4	0.00159464

[truncated: 7 more sheets: Supplementary Table S11, Supplementary Table S12, Supplementary Table S13, Supplementary Table S14, Supplementary Table S15, Supplementary Table S16, Supplementary Table S17]
