# Supplementary material
Source: Research Square preprint supplement (doi:10.21203/rs.3.rs-9678698/v1)
Supplement: Supplementary file 2 [file cae033bd88f1e1e31f436e60.docx]

Multi-omics network modeling reveals the rumen-to-serum metabolic axes driving multi-trait performance in Hu sheep

Qijia Dai 1,†, Yukun Zhang 1,†, Fadi Li 1, Xiaoxue Zhang 2, Chong Li 2, Deyin Zhang 1, Huibin Tian 1, Weimin Wang 1,*

1 *The State Key Laboratory of Grassland Agro-ecosystems, College of Pastoral Agriculture Science and Technology, Lanzhou University, Lanzhou, Gansu 730020, China*

2 *College of Animal Science and Technology, Gansu Agricultural University, Lanzhou, Gansu 730070, China*

† Qijia Dai and Yukun Zhang contributed equally to this work

Corresponding author: Weimin Wang. E-mail: wangweimin@lzu.edu.cn

**Supplementary Tables**

(Note: All Supplementary Tables are provided in the accompanying multi-sheet Excel file.)

**Supplementary Table S1.** Descriptive statistics for the 229 phenotypic traits in 115 Hu ram lambs.

**Supplementary Table S2.** Comprehensive comparisons of 229 host phenotypic traits between the E1 and E2 enterotypes.

**Supplementary Table S3.** Summary of sequencing data and quality control metrics for the 16S rRNA gene amplicon sequencing.

**Supplementary Table S4.** Summary statistics of the 16S rRNA gene amplicon sequence variants (ASVs) following sequence rarefaction.

**Supplementary Table S5.** Significantly differential microbial taxa (genus level) identified by the ANCOM-BC2 algorithm.

**Supplementary Table S6.** Significantly differential microbial taxa (genus level) identified by the ALDEx2 algorithm.

**Supplementary Table S7.** Summary of raw sequencing data and quality control for the rumen metagenome (n = 15).

**Supplementary Table S8.** Summary of MEGAHIT cross-assembly statistics for the rumen metagenome corresponding to the E1 and E2 enterotypes.

**Supplementary Table S9.** Significantly differential carbohydrate-active enzyme (CAZyme) families between the two enterotypes.

**Supplementary Table S10.** Significantly differential Kyoto Encyclopedia of Genes and Genomes (KEGG) metabolic pathways in the rumen metagenome.

**Supplementary Table S11.** Detailed information of the 401 significantly differential ruminal metabolites between the E1 and E2 enterotypes.

**Supplementary Table S12.** Chemical taxonomic classification and distribution of the significantly differential ruminal metabolites.

**Supplementary Table S13.** KEGG pathway topological enrichment analysis results for the significantly differential ruminal metabolites.

**Supplementary Table S14.** Detailed information of the 51 significantly differential host serum metabolites.

**Supplementary Table S15.** Chemical taxonomic classification and distribution of the significantly differential host serum metabolites.

**Supplementary Table S16.** KEGG pathway topological enrichment analysis results for the significantly differential serum metabolites.

**Supplementary Table S17.** Detailed parameter matrix (weights, loadings, and path coefficients) of the targeted partial least squares path modeling (PLS-PM).

**Supplementary Figure**

**Fig. S1** Statistical evaluation and ecological validation of the rumen enterotype clustering in Hu sheep. **A** Determination of the optimal number of clusters (K) using the Calinski-Harabasz (CH) index, which peaks at K = 2. **B** Silhouette plot evaluating the compactness and separation of the two identified enterotypes. The average silhouette width (Si) for each group indicates a more compact community structure in the E2 type compared to the E1 type. **C** Clustering stability evaluation based on 500 bootstrap resamplings, confirming the statistical robustness of the E1 and E2 enterotype designations. **D** Rank-Abundance curves based on the relative abundance of ASVs, illustrating the lower species evenness and higher dominance characteristic of the E1 microbial community. Sample sizes: n = 44 for E1 and n = 71 for E2. ASV: amplicon sequence variant.
